# Supplementary material for: Impact of different fertilizers on the carbonate weathering in a typical karst area, Southwest China: a field column experiment
Source: Copernicus journal article supplement (doi:10.5194/esurf-2016-50), 2016-10-04
Supplement: Supplementary file [file esurf-2016-50-AC3-supplement.pdf]

**Impact of different fertilizers on ~~the~~ carbonate weathering in a typical karst area,  
Southwest China: a field column experiment**

Chao Song<sup>1,2</sup>, Changli Liu<sup>1\*</sup>, Guilin Han<sup>2</sup>, Congqiang Liu<sup>2</sup>

<sup>1</sup>—The Institute of Hydrogeology and Environmental Geology, Chinese Academy of  
Geological Sciences, Shijiazhuang, 050803, Hebei, China

<sup>2</sup>—School of Water Resources and Environment, China University of Geosciences  
(Beijing), Beijing, 100083, China.

The First Author: Chao Song

Email: chao-song@qq.com

Tel/Fax: +86-18931852527

Corresponding Author: Changli Liu

Email: liuchangli@vip.163.com

Tel/Fax: +86-18633876961

带格式的：居中

带格式的：上标

带格式的：上标

16

17 **Abstract:** Carbonate weathering, as a significant vector for the movement of carbon  
18 both between and within ecosystems, ~~are-is~~ strongly influenced by ~~anthropogenic~~  
19 ~~perturbations such as~~ agricultural fertilization, ~~— since the addition of fertilizers tends~~  
20 ~~to change the chemical characteristics of soil such as the pH-value.~~ Different  
21 fertilizers may exert a different impact on carbonate weathering, but ~~their—these~~  
22 ~~discrepancies~~ differences are ~~as of yet~~ not ~~still~~ well-known ~~so far~~. In this study, a field  
23 column experiment was ~~employed—conducted~~ to explore the responses of carbonate  
24 weathering to ~~the addition of~~ different fertilizers ~~addition. The eleven different~~  
25 ~~treatments with three replicates including control,  $\text{NH}_4\text{NO}_3$ ,  $\text{NH}_4\text{HCO}_3$ ,  $\text{NaNO}_3$ ,~~  
26  ~~$\text{NH}_4\text{Cl}$ ,  $(\text{NH}_4)_2\text{CO}_3$ ,  $\text{Ca}_3(\text{PO}_4)_2$ ,  $(\text{NH}_4)_3\text{PO}_4$ , fused calcium magnesium phosphate~~  
27 ~~fertilizer (Ca-Mg-P), Urea and  $\text{K}_2\text{CO}_3$  were established in this column experiment,~~  
28 ~~where limestone and dolostone tablets were buried at the bottom of each to determine~~  
29 ~~the weathering amount and ratio of carbonate in soil. We compared 11 different~~  
30 ~~treatments, including a control treatment, using 3 replicates per treatment. Carbonate~~  
31 ~~weathering was assessed by measuring the weight loss of limestone and dolostone~~  
32 ~~tablets buried at the bottom of the soil-filled columns.~~ The results showed that the  
33 addition of urea,  $\text{NH}_4\text{NO}_3$ ,  $\text{NH}_4\text{HCO}_3$ ,  $\text{NH}_4\text{Cl}$  and  $(\text{NH}_4)_2\text{CO}_3$  distinctly increased  
34 carbonate weathering, which was attributed to the nitrification of  $\text{NH}_4^{+}$ , ~~and~~ ~~the~~  
35 addition of  $\text{Ca}_3(\text{PO}_4)_2$ , Ca-Mg-P and  $\text{K}_2\text{CO}_3$  induced carbonate precipitation due to  
36 ~~the~~ common ion effect. ~~Whereas the~~ The addition of  $(\text{NH}_4)_3\text{PO}_4$  and  $\text{NaNO}_3$  ~~addition~~  
37 did not ~~significantly~~ impact ~~significantly on~~ carbonate weathering. The results of

带格式的：字体颜色：红色

NaNO<sub>3</sub> treatment ~~seem to be raising~~ a new question: the ~~negligible~~ impact of nitrate on carbonate weathering may result in ~~the~~ overestimation of ~~the~~ impact of N-fertilizer on CO<sub>2</sub> consumption by carbonate weathering at the regional/global scale, if the effects of NO<sub>3</sub> and NH<sub>4</sub> are not distinguished. ~~Moreover, in order to avoid misunderstanding more or less, the statement that nitrogenous fertilizer can aid carbonate weathering should be replaced by ammonium fertilizer.~~

**Keywords:** Carbonate weathering; Column experiment; Nitrogenous fertilizer; Phosphate fertilizer; Southwest China

## 1. Introduction

Carbonate weathering plays a significant role in consumption of ~~the elevated~~ atmospheric CO<sub>2</sub> (~~Kump et al., 2000; Liu et al., 2010; Liu et al., 2011~~)(~~Kump et al., 2000; Liu et al., 2010; 2011~~)(~~Kump et al., 2000; Liu et al., 2010; 2011~~). ~~The r~~iverine hydro-chemical composition, such as the ratio of HCO<sub>3</sub><sup>-</sup> ~~and to~~ Ca<sup>2+</sup> + Mg<sup>2+</sup>, is usually employed as an indicator to estimate the CO<sub>2</sub> consumption by natural carbonate weathering at the regional/global scale (~~Hagedorn and Cartwright, 2009; Li et al., 2009~~)(~~Hagedorn and Cartwright, 2009; Li et al., 2009~~)(~~Hagedorn and Cartwright, 2009; Li et al., 2009~~). However, fluvial alkalinity may also be produced by other processes including the reaction between carbonates and the protons derived from: (i) from the nitrification of N-fertilizer a disturbance to CO<sub>2</sub> consumption estimation is introduced because the fluvial alkalinity, Ca<sup>2+</sup> and Mg<sup>2+</sup> may also be

域代码已更改

域代码已更改

~~produced due to the reaction between carbonate and the protons which can originate~~  
~~from the nitrification processes of N fertilizer~~ (Barnes and Raymond, 2009; Chao et  
 al., 2011; Gandois et al., 2011; Hamilton et al., 2007; Oh and Raymond, 2006; Perrin  
 et al., 2008; Pierson-~~w~~Wickmann et al., 2009; Semhi and Suchet, 2000; West and  
 McBride, 2005)(Barnes and Raymond, 2009; Chao et al., 2011; Gandois et al., 2011;  
 Hamilton et al., 2007; Oh and Raymond, 2006; Perrin et al., 2008; Pierson-wickmann  
 et al., 2009; Semhi and Suchet, 2000; West and McBride, 2005)(Barnes and Raymond,  
 2009; Chao et al., 2011; Gandois et al., 2011; Hamilton et al., 2007; Oh and Raymond,  
 2006; Perrin et al., 2008; Pierson-wickmann et al., 2009; Semhi and Suchet, 2000;  
 West and McBride, 2005); (ii) ~~from the~~ sulfuric acid (Lerman and Wu, 2006; Lerman  
 et al., 2007; Li et al., 2008; ~~Li et al., 2009~~)(Lerman and Wu, 2006; Lerman et al.,  
 2007; Li et al., 2008; ~~Li et al., 2009~~)(Lerman and Wu, 2006; Lerman et al., 2007; Li et  
 al., 2008; Li et al., 2009); (iii) ~~from~~ organic acid secreted by microorganisms (Lian et  
 al., 2008)(Lian et al., 2008)(Lian et al., 2008); ~~as well as and (iv) from~~ acidic soil  
 (Chao et al., 2014; ~~Chao et al., 2017~~)(Chao et al., 2014)(Chao et al., 2014). ~~Given~~  
~~the that~~ atmospheric CO<sub>2</sub> is not ~~the a~~ unique weathering agent, differentiating the  
 agent of carbonate weathering is ~~more and more significant to enable~~important for the  
 accurate budgeting of ~~the~~ net CO<sub>2</sub> consumption by carbonate weathering, especially in  
 agricultural areas where mineral fertilizers are usedarea.

The ~~world-global~~ average annual increase in mineral fertilizer consumption was  
 3.3% from 1961 to 1997, and FAO's study predicts a 1% increase per year until  
 2030 (FAO, 2000). ~~For In~~ China, the consumption of chemical fertilizer increased

域代码已更改

带格式的：字体颜色：文字 1

域代码已更改

域代码已更改

域代码已更改

带格式的：字体：（默认）Times  
New Roman, 小四

from 12.7 Mt in 1980 to 59.1 Mt in 2013 (Fig. 1). The ~~Increasing-increasing~~ consumption of ~~chemical-mineral~~ fertilizer~~s~~ is a significant disturbance factor ~~of-in~~ carbonate weathering and ~~the~~ carbon cycle. ~~Many~~ Several studies ~~have showed-shown~~ that nitrogen fertilizer additions ~~aided-increased in the dissolution of lime-weathering~~ rates, and ~~also~~ increased the total export of DIC from agricultural watersheds (Barnes and Raymond, 2009; Gandois et al., 2011; Hamilton et al., 2007; Oh and Raymond, 2006; Perrin et al., 2008; Pierson-wickmann et al., 2009; Probst, 1986; Semhi and Suchet, 2000; West and McBride, 2005)(~~Barnes and Raymond, 2009; Gandois et al., 2011; Hamilton et al., 2007; Oh and Raymond, 2006; Perrin et al., 2008; Pierson-wickmann et al., 2009; Probst, 1986; Semhi and Suchet, 2000; West and McBride, 2005~~)(Barnes and Raymond, 2009; Gandois et al., 2011; Hamilton et al., 2007; Oh and Raymond, 2006; Perrin et al., 2008; Pierson-wickmann et al., 2009; Probst, 1986; Semhi and Suchet, 2000; West and McBride, 2005). According to ~~the~~ estimation from estimates by Probst (1988) and Semhi et al. (2000), the contribution of N-fertilizers to carbonate dissolution ~~represents-was~~ 30% and 12-26%, ~~respectively,~~ on in two small agricultural carbonate basins in south-western France, the Girou and the Gers, respectively (~~subtributary-and-tributary~~ies of the Garonne ~~river~~River, ~~respectively~~). ~~For-In~~ larger basin level, such as the Garonne ~~river-River basin~~Basin, which is a larger basin (52,000 km<sup>2</sup>), this contribution was estimated at 6% by Semhi et al. (2000). ~~At national and global scales,~~ Perrin et al. (2008) estimated that the ~~deficit-contribution~~ of ~~CO<sub>2</sub>-uptake due to~~ N-fertilizer ~~addition~~ (usually in form of NH<sub>4</sub>NO<sub>3</sub>) represents up to 5.7-13.4% and only 1.6-3.8% ~~of the total CO<sub>2</sub>-flux~~

域代码已更改

带格式的: 上标

naturally consumed by ~~teof the~~ carbonate dissolution; ~~for in~~ France and ~~across the on a~~ global ~~scale~~, respectively.

~~These estimated results~~ estimates described above ~~were~~are usually largely based on calculations ~~that assumed~~ing ~~that~~ a single type of fertilizer (e.g.  $(\text{NH}_4)_2\text{SO}_4$ ,  $\text{NH}_4\text{NO}_3$ , or  $\text{NH}_4\text{Cl}$ ) was used throughout the whole basin that was considered. ~~However~~were usually based on a hypothesis of individual fertilizer (e.g.  $(\text{NH}_4)_2\text{SO}_4$ ,  $\text{NH}_4\text{NO}_3$ , or  $\text{NH}_4\text{Cl}$ ) input into an agricultural basin. Nevertheless, in actual agricultural practices, ~~at an agricultural basin~~, different fertilizers are usually added for different crops ~~in actual agricultural practices~~. The impact of these fertilizers on carbonate weathering and riverine chemical composition may be different. ~~For In the case of~~ nitrogenous fertilizer, 100%  $\text{NO}_3^-$  produced after the addition  $(\text{NH}_4)_2\text{SO}_4$  and  $\text{NH}_4\text{Cl}$  ~~is~~ derived from the nitrification of  $\text{NH}_4^+$ , whilst comparatively, it is only 50% after the addition of  $\text{NH}_4\text{NO}_3$ . ~~The dDifferences of in~~  $\text{NO}_3^-$  sources ~~may cause the produce an~~ evaluated deviation ~~of in~~ the impact of N-fertilizer addition on  $\text{CO}_2$  consumption by carbonate weathering. ~~Because, since the addition of different N-fertilizers (e.g.  $(\text{NH}_4)_2\text{SO}_4$ ,  $\text{NH}_4\text{NO}_3$ ,  $\text{NH}_4\text{Cl}$ ,  $\text{NaNO}_3$  or urea) may result in different contributions to carbonate weathering and relative products such as  $\text{HCO}_3^-$ ,  $\text{Ca}^{2+}$  and  $\text{Mg}^{2+}$ . For phosphate fertilizer, the coprecipitation of phosphate ions with calcium carbonate may inhibit carbonate weathering (Kitano et al., 1978)(Kitano et al., 1978)(Kitano et al., 1978). We ~~suppose~~assume that the response of carbonate weathering to the addition of different fertilizers, such as N-fertilizer ( $\text{NH}_4$  and  $\text{NO}_3$ ), P-fertilizer and Ca/Mg fertilizer, may display differences, which ~~is~~are so far poorly known, ~~so far~~ but likely significant. ~~Here we sought to fully well~~ understand the agricultural ~~force~~impact on natural carbonate weathering, and to accurately evaluate~~

带格式的：字体：小四

带格式的：行距：2 倍行距

带格式的：下标

带格式的：下标

带格式的：上标

带格式的：上标

带格式的：上标

域代码已更改

the CO<sub>2</sub> consumption via carbonate weathering in agricultural areas.

~~Moreover, Tt~~The carbonate-rock-tablet test is used to determine the weathering rate of carbonate rock/mineral from ~~the~~ laboratory to ~~the~~ field (Chao et al., 2011; Chao et al., 2014; Dreybrodt et al., 1996; Gams, 1981; Gams, 1985; Jiang and Yuan, 1999; Liu and Dreybrodt, 1997; Plan, 2005; Trudgill, 1975)(Chao et al., 2014; Chao et al., 2011; Dreybrodt et al., 1996; Gams, 1981; Gams, 1985; Jiang and Yuan, 1999; Liu and Dreybrodt, 1997; Plan, 2005; Trudgill, 1975)(Gams, 1981; Chao et al., 2011; Trudgill, 1975; Chao et al., 2014; Dreybrodt et al., 1996; Gams, 1985; Jiang and Yuan, 1999; Liu and Dreybrodt, 1997; Plan, 2005). In ~~the~~ laboratory, the carbonate-rock-tablet is employed to study the kinetics of calcite dissolution/precipitation (Dreybrodt et al., 1996; Liu and Dreybrodt, 1997)(Dreybrodt et al., 1996; Liu and Dreybrodt, 1997)(Dreybrodt et al., 1996; Liu and Dreybrodt, 1997) and determine the rate of carbonate mineral weathering in ~~the~~ soil column (Chao et al., 2011)(Chao et al., 2011)(Chao et al., 2011). However, in ~~the~~ field, it is also used to observe the rate of carbonate weathering and estimated CO<sub>2</sub> consumption ~~by carbonate weathering~~ (Chao et al., 2014; Jiang and Yuan, 1999; Jiang et al., 2013; Plan, 2005)(Chao et al., 2014; Jiang and Yuan, 1999; Jiang et al., 2013; Plan, 2005)(Chao et al., 2014; Jiang and Yuan, 1999; Jiang et al., 2013; Plan, 2005). Although Liu (2011) argued ~~that the carbonate-rock-tablet test may lead to the deviations of in estimated CO<sub>2</sub> consumption by carbonate weathering at the regional/global scale, in the cases of where there are insufficient representative data (Liu, 2011)(Liu, 2011)(Liu, 2011).~~ our results show that ~~yet it is nonetheless a the preferred option method for the condition-controlled contrast comparative or stimulated experiment~~ (Chao et al., 2011; Chao et al., 2014; Chao et al., 2017) (Chao et al., 2014; Chao et al., 2011)(Chao et al., 2011; Chao et al., 2014). Where the result

域代码已更改

域代码已更改

域代码已更改

域代码已更改

域代码已更改

域代码已更改

~~from the carbonate rock tablet test is consistent to the major element geochemical data of leachates from soil column(Chao et al., 2011).~~

~~Thus/Therefore, in order to observe their difference between the impacts of different fertilizer addition on carbonate weathering in soil, a A field column experiment that involved embedding carbonate-rock-tablets with eleven different treatments~~ was carried out in a typical karst area of southwest China, ~~in order to observe the impacts of different fertilizer additions on carbonate weathering in soil.~~

## 2. Materials and Methods

### 2.1 The study site

This study was carried out in a typical karst area, ~~namely~~ the ~~HuaXi-Huaxi district-District~~ of Guiyang ~~city-City~~, Guizhou ~~provinceeProvince~~, SW China (26°23'N, 106°40'E, 1094 m ~~aslASL~~). Guiyang, the capital city of Guizhou Province, is located in the central part of ~~The-the Provinceprovince~~, covering an area from 26°11'00" to 26°54'20"N and 106°27'20" to 107°03'00"E (~~aboutapproximately~~ 8,000 km<sup>2</sup>), with elevations ranging from 875 to 1655 m ~~above-mean-sea-levelASL~~. Guiyang has a population of more than 1.5 million people, a ~~high-wide~~ diversity of karstic landforms, ~~a-high~~ elevations and low latitude, with a subtropical warm-moist climate, ~~and an average~~ annual ~~average~~ temperature of 15.3 °C and annual precipitation of 1200 mm (~~Lang et al., 2006)(Lang et al., 2006)(Lang et al., 2006)~~. A monsoonal climate often results in high precipitation during summer, ~~with-and-~~ much less during winter, although the humidity is often high ~~during-throughout~~ most of the year (~~Han and Jin, 1996)(Han and Jin, 1996)(Han and Jin, 1996)~~. Agriculture is a major land use in order to produce the vegetables and foods in the suburb~~s~~ of Guiyang (~~Liu et al., 2006)(Liu~~

带格式的：上标

域代码已更改

域代码已更改

域代码已更改

et al., 2006)(Liu et al., 2006). The consumption of chemical fertilizer increased from 0.8-150 kg/ha Mt in 1980 to 4.0190 kg/ha-Mt in 2013 (GBS, 2014)(GBS, 2014)(GBS, 2014).

域代码已更改

## 2.2 Soil properties

The soil used in this column experiment was sampled from the B horizon (below 20 cm in depth) of yellow-brown soil ~~in from~~ ~~dug from~~ a cabbage-corn or capsicum-corn rotation plantation in Huaxi ~~dDistrict,~~ ~~#The soil was~~ air-dried, ground to pass through a 2-mm sieve, mixed thoroughly and used for the soil columns. The soil pH ( $V_{\text{soil}}:V_{\text{water}} = 1:2.5$ ) ~~were-was~~ determined by pH meter. The chemical characteristics of the soil, including organic matter (OM),  $\text{NH}_4\text{-N}$ ,  $\text{NO}_3\text{-N}$ , available P, available K, available Ca, available Mg, ~~available S and~~ available Fe, and available S were determined according to the Agro Services International (ASI) M ~~method~~ (Hunter, 1980)(Hunter, 1980)(Hunter, 1980). ~~OM was determined using an where the~~ extracting solution ~~used for O.M-contained~~ ed 0.2 mol  $\text{l}^{-1}$  NaOH, 0.01 mol  $\text{l}^{-1}$  EDTA, 2\_% methanol, and 0.005\_% Superfloc 127, ~~-,~~  $\text{NH}_4\text{-N}$ ,  $\text{NO}_3\text{-N}$ , available Ca, and Mg were determined ~~based-using on-an extraction-extracting solution of by~~ 1 mol  $\text{l}^{-1}$  KCl solution, whereas available K, P and Fe were determined using an extracted by extracting solution containing 0.25 mol  $\text{l}^{-1}$   $\text{NaHCO}_3$ , 0.01 mol  $\text{l}^{-1}$  EDTA, 0.01 mol  $\text{l}^{-1}$   $\text{NH}_4\text{F}$ , and 0.005\_% Superfloc 127, ~~-,~~ Finally, and available S was determined using an extracting solution of ed by 0.1 mol  $\text{l}^{-1}$   $\text{Ca}(\text{H}_2\text{PO}_4)_2$  and 0.005\_% Superfloc 127. The results are shown in Table 1.

域代码已更改

## 2.3 Soil column and different fertilization treatments

In order to test the hypothesis that the ~~responses of the~~ impact of different chemical fertilizers on carbonate weathering may be different, columns ( $\varnothing = 20$  cm, H= 15 cm) were constructed from 20 cm diameter polyvinylchloride (PVC) pipe (Fig. 2). A hole ( $\varnothing = 2$  cm) ~~were was established placed~~ at the bottom of each column to discharge soil water from ~~the of~~ soil column. A ~~polyethylene net mesh~~ ( $\varnothing$  0.5 mm) was placed in the bottom of the columns to prevent ~~the soil~~ loss ~~of the filter material~~. ~~A 2 cm thick filter sand layer, with 2 cm thickness including gravel, coarse sand and fine sand, was spread on over the net.~~ Two different carbonate rock tablets were buried in the bottom of each ~~soil~~ column (Fig. 2). ~~According to~~ Based on the common kinds of chemical fertilizers and the main objective of this study, eleven fertilization treatments, ~~each~~ with three replicates, ~~were set up~~ in the field column experiment. ~~There are were set up:~~ (1) control without fertilizer (CK); (2) 43g  $\text{NH}_4\text{NO}_3$  fertilizer (CF); (3) 85g  $\text{NH}_4\text{HCO}_3$  fertilizer (NHC); (4) 91g  $\text{NaNO}_3$  fertilizer (NN); (5) 57g  $\text{NH}_4\text{Cl}$  fertilizer (NCL); (6) 51g  $(\text{NH}_4)_2\text{CO}_3$  fertilizer (NC); (7) 52g  $\text{Ca}_3(\text{PO}_4)_2$  fertilizer (CP); (8) 15g  $(\text{NH}_4)_3\text{PO}_4$  fertilizer (NP); (9) 44g fused calcium-magnesium phosphate fertilizer (Ca-Mg-P); (10) 32g Urea fertilizer (U); and (11) 10g  $\text{K}_2\text{CO}_3$  fertilizer (PP). ~~To shorten the experiment time and enhance the effect of fertilization, the added amount of fertilizers in these treatments motioned above was increased to 30 times than its local practical amount (N fertilizer: 160 kg N  $\text{ha}^{-1}$ ; P fertilizer: 50 kg P  $\text{ha}^{-1}$ ; K fertilizer: 50 kg K  $\text{ha}^{-1}$ ).~~ ~~The~~ An aliquot of 6 kg of soil was weighed (bulk density = 1.3 g/cm<sup>3</sup>), mixed ~~perfeet~~thoroughly with one of the above fertilizers, ~~respectively,~~ and filled into its own column. This process was repeated for all three

带格式的：上标

带格式的：上标

replicates of the 11 fertilizer treatments. These soil columns were placed at the field experiment site in Huaxi District, Guiyang of Southwestern China for a whole year.

#### 2.4 The rate of carbonate weathering

Two different kinds of carbonate rock tablets (2 cm × 1 cm × 0.5 cm in size) were established-placed in the bottom of each soil column to explore-examine the rate of carbonate weathering in the soil. The two different kinds of carbonate rock collected from the karst area of Huaxi District were: (1) limestone with 60-65% micrite, 30-35% microcrystalline calcite, and 2-3% pyrite; and (2) dolostone with 98-99% power-fine crystalline dolomite, 3-5% microcrystalline calcite, 1% pyrite, and little trace quantities organic matter. All of the tablets were baked-heated at 80 °C for 4 hours, then weighed in a 1/10000 electronic balance in the laboratory, tied-to-a-labeled by tying a label with fishing line, and then buried at the bottom of each soil column. After a whole year, the tablets were taken-out-removed carefully, rinsed, baked and weighed-after a whole year.

The amount of weathering carbonate-weathering ( $A_{ew}$ ), the ratio of carbonate weathering ( $R_{ew}$ ) and the rate of carbonate-weathering ( $R_{aew}$ ) for limestone and dolomite were calculated according to the weight difference of the tablets using the following formulas:

$$A_{ew} = (W_i - W_f) \quad (1)$$

$$R_{ew} = (W_i - W_f) / W_i \quad (2)$$

$$R_{aew} = (W_i - W_f) / (S \cdot T) \quad (3)$$

where  $W_i$  is the initial weight of the carbonate-rock-tablets,  $W_f$  is their final weights,

带格式的: 字体: 倾斜

带格式的: 字体: 倾斜

S is the surface area of carbonate ~~weathering rock~~ tablets, and T is the length of the experimental al period.

## 2.5 Statistical analysis

~~Statistical analysis was performed using IBM SPSS 20.0 (Statistical Graphics Crop, Princeton, USA). All results of carbonate weathering were reported as the means  $\pm$  standard deviations (SD) means standard errors (SE) for the three replications. as~~ Statistical analysis was performed using IBM SPSS 20.0 (Statistical Graphics Crop, Princeton, USA).

带格式的: 缩进: 首行缩进: 0.74 厘米

带格式的: 字体: 加粗

## 3. Results

### 3.1 ~~The w~~Weathering rate of carbonate under different fertilized treatments

~~weathering of under different treatments~~ The ~~\_~~ amount ( $A_{ew}$ ), ~~\_~~ and the ratio ( $R_{ew}$ ) and the rate ( $R_{ew}$ ) of ~~limestone and dolostone~~ carbonate weathering ~~were~~ listed ~~\_~~ in Table 2. ~~were listed~~ The results showed ~~ed~~ that in Table 2, and the  $R_{ew}$  were plotted in Fig. 3. The results in Table 2 and Fig. 3 ~~The results showed~~ The  $A_{ew}$ ,  $R_{ew}$  and  $R_{ew}$  of carbonate weathering limestone and dolomite weathering under urea,  $NH_4NO_3$ ,  $NH_4Cl$ ,  $(NH_4)_2CO_3$ ,  $NH_4HCO_3$ ,  $NH_4Cl$  and  $NH_4HCO_3$   $(NH_4)_2CO_3$  treatments were  $8.48 \pm 0.96$ ,  $6.42 \pm 0.28$ ,  $5.54 \pm 0.64$ ,  $4.44 \pm 0.81$  and  $4.48 \pm 0.95$  % (mean  $\pm$  SD,  $p < 0.05$ ) positive, and ~~much bigger~~ significantly greater than that under the control treatment  $0.48 \pm 0.14$  % (see Fig. 3~~-~~). In addition, the observed  $R_w$  of ~~as observed in~~ ~~dolomite~~ ~~stone~~ were ~~(~~  $6.59 \pm 0.67$ ,  $5.30 \pm 0.87$ ,  $4.77 \pm 0.78$ ,  $4.94 \pm 1.91$  and  $3.22 \pm 0.87$  % respectively, under these same five fertilization treatments, in contrast to ~~vs.~~

带格式的: 缩进: 首行缩进: 0 厘米

带格式的: 字体: 倾斜

带格式的: 字体: 倾斜

带格式的: 字体: 倾斜

-0.31 ± 0.09 ‰ in the control treatment). This suggesting manifested clearly demonstrates that the addition of these five fertilizers can aid and increased the rate of the chemical weathering of carbonate weathering.

The remaining st-treatments had made no significant differences in the  $R_w$  and  $R_{eqw}$  of limestone and dolomite in comparison with to the control treatment (Fig. 3). In the  $(NH_4)_3PO_4$  treatment, the  $A_{ew}R_w$  and  $R_{aew}$  were only  $1.08 \pm 0.34 \text{ ‰}$ ,  $-0.0028 \text{ g}$  and  $-0.00070.75 \pm 0.21 \text{ ‰ g}$  for limestone and dolomite, respectively, while the  $R_{aw}$  were  $4.00 \pm 1.15 \text{ g m}^{-2} \text{ a}^{-1} - 1.08 \text{ ‰}$  and  $1.00 \pm 1.01 - 0.75 \text{ g m}^{-2} \text{ a}^{-1} \text{ ‰}$  for limestone and dolomite, respectively. These values are less than those under the other four  $NH_4$ -fertilizers, as mentioned above. The  $A_{ew}$ ,  $R_{ew}$ ,  $R_w$  and  $R_{aew}$  in the  $NaNO_3$  treatments failed to show a remarkable-notable differences with the control treatment, implying-exhibiting little effect of the  $NaNO_3$  fertilizer addition on carbonate weathering (Fig. 3).

However, except for the  $R_{ew}$  of limestone approaching zero in the  $Ca_3(PO_4)_2$  treatment-approaching zero, all the values of the  $A_{ew}$ ,  $R_{ew}$  and  $R_{aew}$  of two different-carbonate in Ca-Mg-P- and  $K_2CO_3$  and  $Ca_3(PO_4)_2$  treatments showed a negative values. This indicating-indicates that the addition of Ca-Mg-P-,  $K_2CO_3$  and  $Ca_3(PO_4)_2$  fertilizers can lead to the-precipitation at the surface of the carbonate mineral, which can be explained by common ion effect.

### 3.2 The eComparison of limestone of dolomite

In Fig. 4, we plotted the  $R_w$  of In order to compare The result of limestone with vs.

带格式的: 字体: 倾斜

带格式的: 缩进: 首行缩进: 0 厘米

带格式的: 字体: 倾斜

带格式的: 字体: 倾斜

带格式的: 字体: 倾斜

带格式的: 上标

带格式的: 上标

带格式的: 上标

带格式的: 上标

带格式的: 字体: 倾斜

带格式的: 字体: 倾斜

带格式的: 字体: 倾斜

带格式的: 缩进: 首行缩进: 0.74 厘米

带格式的: 字体: 倾斜

带格式的: 字体: 非倾斜

dolomite tablets in a we plotted Fig. 4, a linear correelation diagram, in order to compare the weathering responses of ~~with the  $R_w$  of limestone vs. dolostone tablets~~ limestone with dolostone. The results shows that the  $R_w$  of limestone and dolostone exhibits a high positive correlaetion ( $R^2=0.9773$ ; see Fig. 4), ~~suggest~~indicating that the weathering of ANOVA was ~~use the limestone and dolostone are similar~~ under different treatments ~~were similar~~. Thus, we will explain the results ~~with in terms of carbonates, rather than instead of~~ by way of the individual dolostone and limestone. ~~was used to determine the differences of weathering rate between limestone and dolostone.~~

#### 4. Discussion

##### 4.1 The carbonate rock tablet test: the validation of this experiment

~~The carbonate rock tablet test is used to determine the weathering rate of carbonate rock/mineral from laboratory to field (Gams, 1981; Chao et al., 2011; Trudgill, 1975; Chao et al., 2014; Dreybrodt et al., 1996; Gams, 1985; Jiang and Yuan, 1999; Liu and Dreybrod, 1997; Plan, 2005). In laboratory, the carbonate rock tablet is employed to study the kinetics of calcite dissolution/precipitation (Dreybrodt et al., 1996; Liu and Dreybrod, 1997) and determine the rate of carbonate mineral weathering in soil column (Chao et al., 2011). However, in field, it is also used to observe the rate of carbonate weathering and estimated  $CO_2$  consumption by carbonate weathering (Chao et al., 2014; Jiang and Yuan, 1999; Jiang et al., 2013; Plan, 2005). Although Liu (2011) argue that the carbonate rock tablet test may lead to the deviation of~~

带格式的：字体：倾斜

带格式的：上标

带格式的：字体：加粗

带格式的：字体：加粗

域代码已更改

带格式的：字体：加粗

带格式的：字体：加粗

域代码已更改

带格式的：字体：加粗

带格式的：字体：加粗

域代码已更改

带格式的：字体：加粗

带格式的：字体：加粗

域代码已更改

带格式的：字体：加粗

estimated CO<sub>2</sub> consumption by carbonate weathering at the regional/global scale in the case of insufficient representative data (Liu, 2011), our results show that it is a preferred option for the condition controlled contrast or stimulated experiment (Chao et al., 2011; Chao et al., 2014), where the result from the carbonate rock tablet test is consistent to the major element geochemical data of leachates from soil column (Chao et al., 2011).

In this study, every procedure to establish soil column with carbonate rock tablets in the bottom of each was strictly same, including the size of column, the preparation and column filling of soil sample, the setting and test of carbonate rock tablets, etc. Moreover, three replicates of each treatment were designed. We consider the experiment design can meet the objective of this study and the results of carbonate rock tablet test are therefore valid and credible.

#### 4.1 The kinetics of carbonate dissolution/precipitation: controlling factors

Experimental studies of carbonate dissolution kinetics have shown metal carbonate weathering usually depends upon three parallel reactions occurring at the carbonate interface (Chou et al., 1989; Plummer et al., 1978; Pokrovsky et al., 2009) (Chou et al., 1989; Plummer et al., 1978; Pokrovsky et al., 2009):

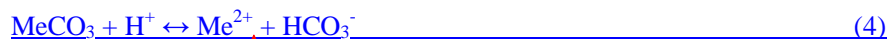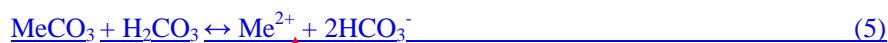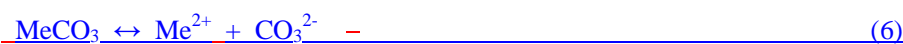

where Me = Ca, Mg. As Eq. (5) describes, atmospheric/soil CO<sub>2</sub> is usually regarded considered to be as the natural weathering agent of carbonate. In watersheds

带格式的：字体：加粗

域代码已更改

带格式的：字体：加粗

带格式的：字体：加粗

域代码已更改

带格式的：字体：加粗

带格式的：字体：加粗

域代码已更改

带格式的：字体：加粗

带格式的：字体：加粗

域代码已更改

带格式的：非上标/ 下标

带格式的：非上标/ 下标

带格式的：非突出显示

with calcite- and dolomite-containing bedrock,  $\text{H}_2\text{CO}_3$  formed in the soil zone usually reacts with carbonate minerals, resulting in dissolved Ca, Mg, and  $\text{HCO}_3^-$  as described in Eq. (5) (Andrews and Schlesinger, 2001; Shin et al., 2014)(Andrews and Schlesinger, 2001; Shin et al., 2014). Although it has been proven that the reaction of carbonate dissolution is mainly controlled by the amount of rainfall (Amiotte Suchet et al., 2003; Egli and Fitze, 2001; Kiefer, 1994)(Amiotte Suchet et al., 2003; Egli and Fitze, 2001; Kiefer, 1994), we consider that the effect of rainfall is equal in each soil column, and hence is disregarded ~~unconsidered~~ as a controlling factor in this study. The Eq. (4) suggests that the proton from other origins, such as the nitrification processes of  $\text{NH}_4^+$ , as mentioned in the Introduction section, can play the role of weathering agent in agricultural areas. In this study, the urea,  $\text{NH}_4\text{NO}_3$ ,  $\text{NH}_4\text{HCO}_3$ ,  $\text{NH}_4\text{Cl}$ , and  $(\text{NH}_4)_2\text{CO}_3$  amendments increased (10 to 17-fold) the natural weathering rate ~~offrom~~  $2.00 \text{ g m}^{-2} \text{ a}^{-1}$  ~~fromfor~~ limestone tablets in the control treatment (~~t~~Table 2). Thus, these increases are strongly ~~relativeted~~ related to the effect of ~~the~~ proton released from the nitrification of  $\text{NH}_4^+$ . ~~OnIn the contraryst,~~ the carbonate precipitation will occur as due to the backward reaction of ~~the~~ Eq. (5) in the following cases: (1) the degassing of dissolved  $\text{CO}_2$ ; (2) soil evapotranspiration; or (3) the common ion effect: the increase of  $\text{Ca}^{2+}$ ,  $\text{Mg}^{2+}$  or  $\text{CO}_3^{2-}$  in a weathering-system with equilibrium between water and calcite (Calmels et al., 2014; Dreybrodt, 1988)(Calmels et al., 2014; Dreybrodt, 1988).

## 4.2 The ~~m~~Main reactions and effects in different treatments

The main reactions and effects of every treatment in this study ~~were~~ are listed in

域代码已更改

域代码已更改

域代码已更改

带格式的: 缩进: 首行缩进: 0.74 厘米

Table 3.

**(1) The nitrification in  $\text{NH}_4$ -fertilizer:  $\text{NH}_4\text{NO}_3$ ,  $\text{NH}_4\text{HCO}_3$ ,  $\text{NH}_4\text{Cl}$ ,  $(\text{NH}_4)_2\text{CO}_3$  and urea**

In urea ( $\text{CO}(\text{NH}_2)_2$ ) treatment, the enzyme urease rapidly hydrolyzes the urea-N ( $\text{CO}(\text{NH}_2)_2$ ) to  $\text{NH}_4^+$  ions (Eq. (7)) when urea is applied to the soil (Soares et al., 2012)(Soares et al., 2012).

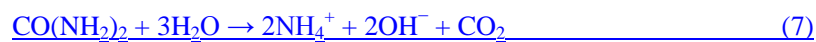

Although the study from Singh et al. showed that a part of  $\text{NH}_4^+$  may be lost as ammonia ( $\text{NH}_3$ ) and subsequently as nitrous oxide ( $\text{N}_2\text{O}$ ) (Singh et al., 2013)(Singh et al., 2013), yet the remaining ammonium ( $\text{NH}_4^+$ ) is mainly oxidized during nitrification in soil by autotrophic bacteria (, like such as Nitrosomonas,) during nitrification, resulting in nitrite  $\text{NO}_2^-$  and  $\text{H}^+$  ions. Nitrite is, in turn, oxidized by another bacterium, such as Nitrobacter, resulting in nitrate ( $\text{NO}_3^-$ ) (Eq. (8)) (Perrin et al., 2008)(Perrin et al., 2008).

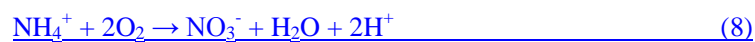

The protons ( $\text{H}^+$ ) produced by nitrification can be neutralized in two ways:

(i) either by exchange process with base cations in the soil exchange complex

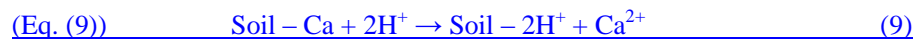

or (ii) or via carbonate mineral dissolution (Eq.(10))

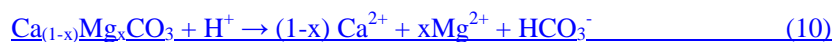

Consequently, after by combining Eq. (8) and Eq. (10) are combined, carbonate weathering by protons produced by nitrification is can supposedly be expressed as to becomes (Eq. 11) (See details in Perrin et al., 2008 and Gandois et al., 2011).

带格式的：缩进：首行缩进： 0.74 厘米

域代码已更改

带格式的：缩进：首行缩进： 0.74 厘米

域代码已更改

域代码已更改

带格式的：缩进：首行缩进： 0.74 厘米

带格式的：缩进：悬挂缩进： 0.06 字符，左 2.02 字符

带格式的：缩进：首行缩进： 0.74 厘米

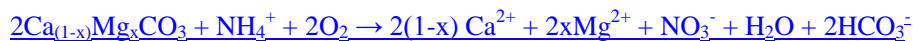

(11)

As discussed above, provided that the loss as ammonia ( $\text{NH}_3$ ) and nitrous oxide ( $\text{N}_2\text{O}$ ) after hydrolyzation is ~~uneconsidered~~disregarded in this study, the final equation of carbonate weathering in  $\text{NH}_4\text{NO}_3$ ,  $\text{NH}_4\text{HCO}_3$ ,  $\text{NH}_4\text{Cl}$ ,  $(\text{NH}_4)_2\text{CO}_3$  and urea treatments will be as follow~~eds~~-as, respectively:

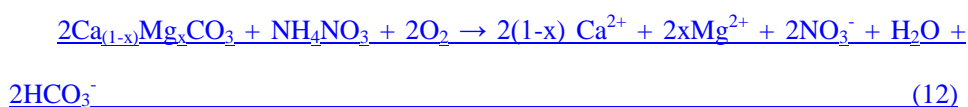

(12)

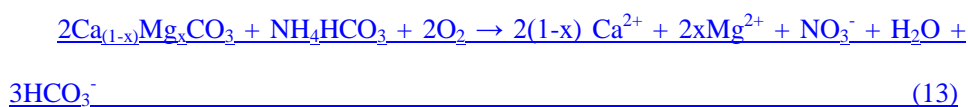

(13)

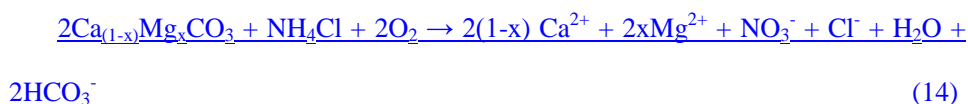

(14)

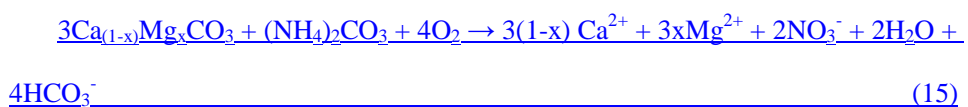

(15)

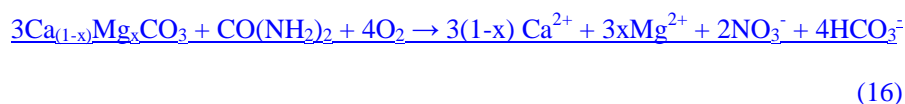

(16)

### (2) No effect of $\text{NO}_3$ -fertilizer treatment: $\text{NaNO}_3$ treatment

In the  $\text{NaNO}_3$  treatment, the reaction occurs according to ~~as~~Eq. (17), indicating that the addition of  $\text{NO}_3$ -fertilizer does not significantly influence carbonate weathering.

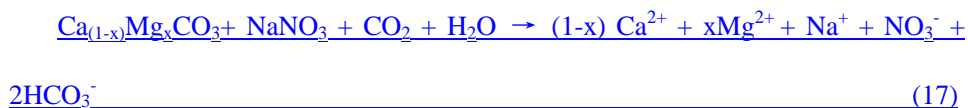

(17)

### (3) The eCommon ion effect: $\text{K}_2\text{CO}_3$ treatment

In the  $\text{K}_2\text{CO}_3$  treatment,  $\text{CO}_3^{2-}$  and  $\text{HCO}_3^-$  will be produced after the addition of  $\text{K}_2\text{CO}_3$  according to Eq. (18) ~~after adding  $\text{K}_2\text{CO}_3$~~ , hence resulting in carbonate

带格式的：缩进：首行缩进： 0.74 厘米

带格式的：缩进：首行缩进： 0.74 厘米

带格式的：缩进：首行缩进： 0.74 厘米

带格式的：下标

带格式的：下标

precipitation as described in Eq. (19), due to the common ion effect.

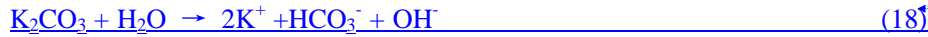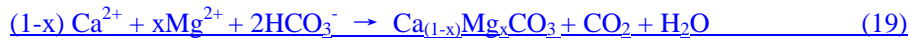

#### (4) Complex effects: Nitrification versus Inhibition effect of $\text{PO}_4$ in $(\text{NH}_4)_3\text{PO}_4$ treatments

~~For~~In the  $(\text{NH}_4)_3\text{PO}_4$  treatment, the reaction of carbonate weathering will occur according to Eq. (11) due to the nitrification of  $\text{NH}_4^+$  ionized from the  $(\text{NH}_4)_3\text{PO}_4$  fertilizer ~~will occur the nitrification. Whilst t~~The  $\text{PO}_4^{3-}$  anion will exert an inhibition to calcite dissolution, as calcium orthophosphate (Ca-P) precipitation is produced on the surface of calcite after the addition of  $\text{PO}_4^{3-}$  in soil (reaction:  $\text{Ca} + \text{PO}_4 \rightarrow \text{Ca-P}$ ), resulting in inhibition of the calcite dissolution ~~of calcite~~.

#### (5) Complex effects: Common ion effect versus Inhibition effect of $\text{PO}_4$ in $\text{Ca}_3(\text{PO}_4)_2$ and Ca-Mg-P treatments

In the  $\text{Ca}_3(\text{PO}_4)_2$  and Ca-Mg-P treatments, on the one hand, ~~the~~ $\text{Ca}_{(1-x)}\text{Mg}_x\text{CO}_3$  is produced when the concentrations of  $\text{Ca}^{2+}$  (or/and  $\text{Mg}^{2+}$ ) increases ~~as~~ according to following Eq. (19). On the other hand, the inhibition effect of phosphate will cause ~~that~~ calcium phosphate precipitation to be produced on the surface of carbonate minerals after the addition of P in soil (reaction:  $\text{Ca} + \text{PO}_4 \rightarrow \text{Ca-P}$ ), ~~correspondingly~~ resulting in inhibition the carbonate precipitation.

#### 4.3 The Difference between $\text{NH}_4^+$ and $\text{NO}_3^-$ in impacts on carbonate weathering and the implication on the estimation of $\text{CO}_2$ consumption

In order to further compare the difference between  $\text{NH}_4^+$  and  $\text{NO}_3^-$  effects on carbonate weathering, the initial molar amount of fertilizer-derived  $\text{NH}_4$  per unit in

带格式的：缩进：左侧： 0.74 厘米

带格式的：缩进：首行缩进： 0.74 厘米

带格式的：字体：小四

带格式的：缩进：首行缩进： 0.74 厘米

带格式的：下标

带格式的：缩进：首行缩进： 0.74 厘米

every treatment were calculated, and are listed in Table 4. The results show that the amount of  $\text{NH}_4^+$  hydrolyzed from urea is 1.06 mole, while  $\text{NH}_4^+$  ionized from  $\text{NH}_4\text{NO}_3$ ,  $\text{NH}_4\text{HCO}_3$ ,  $\text{NH}_4\text{Cl}$ ,  $(\text{NH}_4)_2\text{CO}_3$  and  $(\text{NH}_4)_3\text{PO}_4$  is 0.54 mole, 1.08 mole, 1.07 mole, 1.06 mole, and 0.03 mole, respectively (Table 4). The  $R_w$  of limestone tablets and the initial amount of  $\text{NH}_4^+$  per treatment are plotted in Fig. 45. A distinct relationship between them is observed, in that: the  $R_w$  values in  $\text{NH}_4\text{NO}_3$ ,  $\text{NH}_4\text{HCO}_3$ ,  $\text{NH}_4\text{Cl}$ ,  $(\text{NH}_4)_2\text{CO}_3$  and urea treatments are ~~bigg~~ larger than in the control treatment, where the initial amount of  $\text{NH}_4^+$  ~~displays~~ yields similar results (Fig. 45). This suggests that carbonate weathering in  $\text{NH}_4\text{NO}_3$ ,  $\text{NH}_4\text{HCO}_3$ ,  $\text{NH}_4\text{Cl}$ ,  $(\text{NH}_4)_2\text{CO}_3$  and urea treatments are mainly attributed to the dissolution reaction described as Eq. (11). This process of carbonate weathering by protons released from nitrification has been proven by many studies, from the laboratory to the field (Barnes and Raymond, 2009; Bertrand et al., 2007; Biasi et al., 2008; Chao et al., 2011; Errin et al., 2006; Gandois et al., 2011; Hamilton et al., 2007; Oh and Raymond, 2006; Perrin et al., 2008; Semhi and Suchet, 2000; West and McBride, 2005) (~~Barnes and Raymond, 2009; Bertrand et al., 2007; Biasi et al., 2008; Chao et al., 2011; Errin et al., 2006; Gandois et al., 2011; Hamilton et al., 2007; Oh and Raymond, 2006; Perrin et al., 2008; Semhi and Suchet, 2000; West and McBride, 2005~~). We have noted that the  $R_w$  values in  $\text{NH}_4\text{HCO}_3$  and  $(\text{NH}_4)_2\text{CO}_3$  treatments are ~~lowerless than-even half of~~ those in urea treatment ~~in despite-of~~ adding the same amount of fertilizer-derived  $\text{NH}_4$  (~~about-approximately~~ 1.07 mole). This is probably because the two fertilizers,  $\text{NH}_4\text{HCO}_3$  and  $(\text{NH}_4)_2\text{CO}_3$ , are easier to decompose and produce ~~the- $\text{NH}_3$  and  $\text{CO}_2$  gases as-following~~ according to Eq. (20) and (21), resulting in ~~the-amounts~~ of fertilizer-derived  $\text{NH}_4$  ~~ofthat are~~ lower than 1.07 moles.

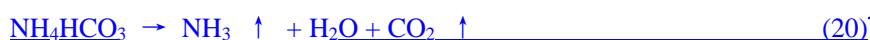

域代码已更改

带格式的: 右, 缩进: 首行缩进: 0.74 厘米

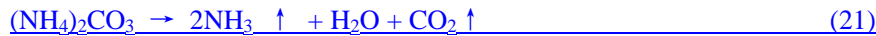

The  $A_w$  and  $R_w$  in the  $(\text{NH}_4)_3\text{PO}_4$  treatment, unlike in other  $\text{NH}_4$ -fertilizer treatments, ~~had not~~ do not show a significant increase compared to ~~with~~ the control treatment, which is not only owing to the low amount of added  $\text{NH}_4^+$  in  $(\text{NH}_4)_3\text{PO}_4$  treatment (0.3 mole; see Table 4), but also more or less relative to the inhibition of phosphate (Chien et al., 2011; Wang et al., 2012)(Chien et al., 2011; Wang et al., 2012). After the addition of  $(\text{NH}_4)_3\text{PO}_4$  in soil, calcium orthophosphate (Ca-P) precipitation will form on calcite surfaces, which is initiated with the aggregation of clusters leading to the nucleation and subsequent growth of Ca-P phases, at various pH values and ionic strengths relevant to soil solution conditions (Chien et al., 2011; Wang et al., 2012)(Chien et al., 2011; Wang et al., 2012).

However, in Fig. 3, there is no significant different between the  $R_w$  ~~without significant difference with control treatment in the~~  $\text{NaNO}_3$  treatment compared to the control treatment, indicatinges that the addition of  $\text{NO}_3$ -fertilizer does not significantly influence carbonate weathering.

A notable issue herein is that the  $\text{NaNO}_3$  treatment produces the same amount of  $\text{NO}_3^-$  (1.07 mole) as other  $\text{NH}_4$  fertilizer ( $\text{NH}_4\text{NO}_3$ ,  $\text{NH}_4\text{HCO}_3$ ,  $\text{NH}_4\text{Cl}$ ,  $(\text{NH}_4)_2\text{CO}_3$  and urea), but it fails to impact on carbonate weathering, which ~~is raising~~es a new problem. Eq. (5), usually ~~considered~~ as an expression for the natural weathering process of carbonate, is an important reaction ~~for~~ in understanding the kinetics process of carbonate dissolution in carbonate-dominated areas, where the molar ratio of  $\text{HCO}_3^-$  and  $\text{Me}^{2+}$  in the river ~~as an indicator~~ is usually used ~~as an indicator~~ to make estimations of  $\text{CO}_2$  consumption by carbonate weathering at the regional/global scale (Hagedorn and Cartwright, 2009; Li et al., 2009)(Hagedorn and Cartwright, 2009; Li et al., 2009). ~~At~~In agricultural areas, the relationship between  $(\text{Ca}+\text{Mg})/\text{HCO}_3^-$  and

带格式的：缩进：首行缩进： 0.74 厘米

域代码已更改

域代码已更改

域代码已更改

$\text{NO}_3^-$  is usually employed to estimate the contribution of N-fertilizer to riverine  $\text{Ca}^{2+}$ ,  $\text{Mg}^{2+}$ , and alkalinity (Etchanchu and Probst, 1988; Jiang, 2013; Jiang et al., 2009; Perrin et al., 2008; Semhi and Suchet, 2000)(Etchanchu and Probst, 1988; Jiang, 2013; Jiang et al., 2009; Perrin et al., 2008; Semhi and Suchet, 2000). In these studies, the nitrification described as in Eq. (8) is usually considered as the unique origin of  $\text{NO}_3^-$ . According to the results of the  $\text{NaNO}_3$  treatment in this study, the contribution of protons from nitrification to carbonate weathering may be overestimated, if anthropogenic  $\text{NO}_3^-$  is neglected, since the anthropogenic  $\text{NO}_3^-$  does not release the proton described as in Eq. (8). For  $\text{NH}_4\text{NO}_3$  fertilizer, the (Eq. (12)) shows that the two moles of  $\text{Ca}^{2+} + \text{Mg}^{2+}$ ,  $\text{NO}_3^-$ , and  $\text{HCO}_3^-$  will be produced when one mole  $\text{NH}_4\text{NO}_3$  reacts with 2 moles of carbonate, where only half of the  $\text{NO}_3^-$  originates from nitrification described as Eq. (8). This will result in a double overestimation on the contribution of the nitrification to carbonate weathering, and thus thereby mislead the estimation of  $\text{CO}_2$  consumption therein.

At regional scales, if different fertilizers are added simultaneously added to an agricultural area, the estimation of  $\text{CO}_2$  consumption by carbonate weathering might become more complicated, since the mole ratios of  $\text{Ca} + \text{Mg}$ ,  $\text{HCO}_3^-$ , and/or  $\text{NO}_3^-$  between different fertilization treatments are different (see Table 3). Thus, the related anthropogenic inputs (e.g.  $\text{Ca} + \text{Mg}$ ,  $\text{NH}_4$ ,  $\text{NO}_3^-$ ,  $\text{HCO}_3^-$ , etc.) need to be investigated to more accurately estimate the impact of fertilization on carbonate weathering and its  $\text{CO}_2$  consumption.

#### 4.4 The comparison with other studied results

The  $R_w$  and  $R_{aw}$  of limestone in the control treatment in this study were 0.48 % and  $2.00 \text{ g m}^{-2} \text{ a}^{-1}$ , respectively, which These are is generally consistent with the observations of  $0.51\text{--}32.97 \text{ g m}^{-2} \text{ a}^{-1}$  (for  $R_{aw}$ ) in Nongla, Guangxi, a karst area of

域代码已更改

带格式的：缩进：首行缩进： 0.74 厘米

Southwestern China (Zhang, 2011)(Zhang, 2011), and with the results of 0.05-5.06 %  
 (for  $R_w$ ) and 1.08-136.90  $\text{g m}^{-2} \text{a}^{-1}$  (for  $R_{aw}$ ) from the north slope of the Hochschwab  
 mMassif in Australia (Plan, 2005)(Plan, 2005), as determined –using the limestone  
 tablet method. But the  $R_{aw}$  of 2.00  $\text{g m}^{-2} \text{a}^{-1}$  is lower than the results (of 7.0-63.5  
 $\text{g m}^{-2} \text{a}^{-1}$  for  $R_{aw}$ ) from Jinpo Mountain in Chongqing–of, China (Zhang,  
 2011)(Zhang, 2011). These differences in carbonate weathering are mainly attributed  
 to the different types of carbonate rock tablets, climate, micro-environments of soil,  
 etc. The  $R_{aw}$  of limestone in the N-fertilizers treatments isare 20.57-34.71  $\text{g m}^{-2} \text{a}^{-1}$ ,  
 similar to the weathering rate of carbonate in Orchard (32.97  $\text{g m}^{-2} \text{a}^{-1}$ ) at Nongla,  
 Manshan, Guangxi–of, China, whereich usually involves–in fertilization activities.

At larger scales, such as –like–watersheds, the weathering rate is usually  
 estimated by using the riverine hydro-chemical method, which is inconsistent with the  
 results from the carbonate-rock-tablet test. The estimation–of Zeng, et al. (2014)  
 estimateviews that the carbon sink intensity calculated by the carbonate–rock–tablet  
 test is only one sixth of that estimated by–using the riverine hydro-chemical method,  
 due to its own limits in methodology (Zeng et al., 2014)(Zeng et al., 2014). The  
 results from Semhi, et al. (2000) shows theat weathering rates of carbonate rock by  
 using riverine hydro-chemical method are– aboutapproximately 77.5  $\text{g m}^{-2} \text{a}^{-1}$  and  
 50.4  $\text{g m}^{-2} \text{a}^{-1}$  in the upstream and downstream, respectively, of the Garonne river,  
 France–respectively, which are aboutapproximately 25-35 and 2-3-times greater than  
 that in the control treatment (2.00  $\text{g m}^{-2} \text{a}^{-1}$  for natural weathering rate-) and 2-3 times  
 greater than in the N-fertilizer treatment (20.57-34.71  $\text{g m}^{-2} \text{a}^{-1}$  for anthropic  
 weathering rate) in this study. The global natural weathering rate of carbonate  
 reported by Amiotte Suchet, et al. (2003) is 47.8  $\text{g m}^{-2} \text{a}^{-1}$ , which is much higher than  
 that we observed. Thus, we conclude that it is difficult to compare between–the results

域代码已更改

域代码已更改

域代码已更改

域代码已更改

from the carbonate-rock-tablet test and the riverine hydro-chemical method. The carbonate-rock-tablet test is suitable for ~~the~~ research on the ~~condition~~ ~~controlled comparative contrast~~ or stimulated experiments, while the riverine hydro-chemical method is appropriate for ~~the~~ regional investigations and estimations. According to the estimation from Yue et al. (2015), ~~The~~ enhanced  $\text{HCO}_3^-$  flux due to nitrification of  $\text{NH}_4^+$  at Houzhai catchment of Guizhou ~~p~~Province would be  $3.72 \times 10^5$  kg C/year and account for 18.7 % of this flux in the entire catchment(Yue et al., 2015)(Yue et al., 2015). This is similar to estimates from other small agricultural carbonate basins (12–26 %) in ~~S~~southwest France (Perrin et al., 2008; Semhi and Suchet, 2000)(Perrin et al., 2008; Semhi and Suchet, 2000).

## 5. Conclusions

The impact of the addition of different fertilizers ( $\text{NH}_4\text{NO}_3$ ,  $\text{NH}_4\text{HCO}_3$ ,  $\text{NaNO}_3$ ,  $\text{NH}_4\text{Cl}$ ,  $(\text{NH}_4)_2\text{CO}_3$ ,  $\text{Ca}_3(\text{PO}_4)_2$ ,  $(\text{NH}_4)_3\text{PO}_4$ , Ca-Mg-P, ~~U~~urea, and  $\text{K}_2\text{CO}_3$ ) on carbonate weathering was studied in a field column experiment ~~with using~~ carbonate ~~rock-tablets at its bottom of each~~. The amount of weathering ~~amount~~ and the ratio of weathering of carbonate rock tablets showed that the addition of urea,  $\text{NH}_4\text{NO}_3$ ,  $\text{NH}_4\text{HCO}_3$ ,  $\text{NH}_4\text{Cl}$ , and  $(\text{NH}_4)_2\text{CO}_3$  distinctly increased carbonate weathering, which was attributed to the nitrification of  $\text{NH}_4^+$ , ~~and while~~ the addition of  $\text{Ca}_3(\text{PO}_4)_2$ , Ca-Mg-P and  $\text{K}_2\text{CO}_3$  induced carbonate precipitation due to ~~the~~ common ion effect. ~~While~~ ~~The addition of~~  $(\text{NH}_4)_3\text{PO}_4$  and  $\text{NaNO}_3$  ~~addition~~ did not impact significantly on carbonate weathering, where the former can be attributed to ~~the~~ low added amount of  $(\text{NH}_4)_3\text{PO}_4$ , ~~and~~ may be related to the inhibition of phosphate, ~~and while~~ the latter seemed to ~~be raising~~ a new question. The ~~little~~ minor impact of nitrate on

域代码已更改

域代码已更改

carbonate weathering may result in the overestimation of the impact of N-fertilizer on  $\text{CO}_2$  consumption by carbonate weathering at the regional/global scale, if the effects of  $\text{NO}_3$  and  $\text{NH}_4$  are not distinguished. Thus, the related anthropogenic inputs (e.g.  $\text{Ca} + \text{Mg}$ ,  $\text{NH}_4$ ,  $\text{NO}_3^-$ ,  $\text{HCO}_3^-$ , etc.) need to be investigated to more accurately estimate the impact of fertilization on carbonate weathering and its consumption of  $\text{CO}_2$  consumption. **4.2 The kinetics and controlled factors of carbonate weathering**

Experimental studies of carbonate dissolution kinetics have shown metal carbonate weathering usually depends upon three parallel reactions occurring at the carbonate interface (Chou et al., 1989; Plummer et al., 1978; Pokrovsky et al., 2009):

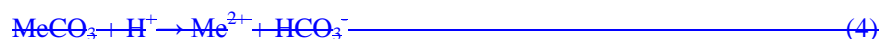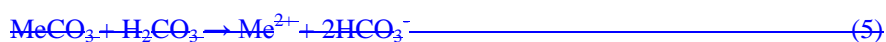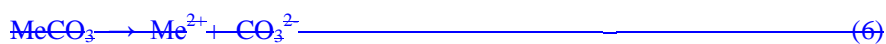

where  $\text{Me} = \text{Ca}, \text{Mg}$ . As Eq. (5) describes, atmospheric/soil  $\text{CO}_2$  is usually regarded as the natural weathering agent of carbonate, whereas many studies have exposed that carbonate weathering can occur due to the reaction (Eq. (4)) between carbonate and the other proton contributors, as mentioned in introduction section: s which can originate from the nitrification processes of N-fertilizer  $\text{H}_4^+$  (Semhi and Suchet, 2000; West and McBride, 2005; Oh and Raymond, 2006; Hamilton et al., 2007; Perrin et al., 2008; Barnes and Raymond, 2009; Pierson-wickmann et al., 2009; Chao et al., 2011; Gandois et al., 2011), from the sulfuric acid acid, (Lerman and Wu, 2006; Lerman et al., 2007; Li et al., 2008; Li et al., 2009), from organic acid secreted by microorganisms (Lian et al., 2008), as well and as from acidic soil (Chao et al.,

带格式的：下标

带格式的：上标

2014)the role of.

In field, carbonate dissolution is mainly controlled by the amount of rainfall (Amiotte Suchet et al., 2003; Egli and Fitze, 2001; Kiefer, 1994), as well as impacted of soil  $\text{CO}_2$  (Andrews and Schlesinger, 2001). We consider that the effect of rainfall on each soil column is same. In this study, the urea,  $\text{NH}_4\text{NO}_3$ ,  $\text{NH}_4\text{HCO}_3$ ,  $\text{NH}_4\text{Cl}$  and  $(\text{NH}_4)_2\text{CO}_3$  amendment increased (10 to 17 fold) the natural weathering rate of  $2.00 \text{ g m}^{-2} \text{ a}^{-1}$  from limestone tablets in control treatment (table 2). These increases may be, in the one hand, attributed to the effect of the proton released from the nitrification of  $\text{NH}_4^+$ . On the other hand, it may be, in theory, related to enhanced microbiogenic  $\text{CO}_2$  due to nitrogenous nutrients stimulation (Eq(5)), because fertilizer application can increase soil  $\text{CO}_2$  flux (Sainju et al., 2008; Bhattacharyya et al., 2013), the increased  $\text{CO}_2$  can enhance carbonate dissolution rate at near neutral or alkali pH (Andrews and Schlesinger, 2001).

According to the added amount of different fertilization treatment, the molar amount of added nitrogen nutrient in  $\text{NaNO}_3$  treatment is  $1.07 \text{ mol}$ , much bigger than in  $\text{NH}_4\text{NO}_3$ , equivalent to  $\text{NH}_4\text{HCO}_3$  and  $\text{NH}_4\text{Cl}$  treatment. However, the  $A_{\text{ew}}$  and  $R_{\text{ew}}$ , and  $R_{\text{aew}}$  of  $\text{NaNO}_3$  treatment is far less (Fig. 3 and table 2), inhibiting that the increases of carbonate weathering rate in urea,  $\text{NH}_4\text{NO}_3$ ,  $\text{NH}_4\text{HCO}_3$ ,  $\text{NH}_4\text{Cl}$  and  $(\text{NH}_4)_2\text{CO}_3$  amendment have no distinct relationship with enhanced microbiogenic  $\text{CO}_2$  due to nitrogenous fertilizer amendment.

#### 4.3 The effect of nitrification of $\text{NH}_4$ fertilizer

In urea ( $\text{CO}(\text{NH}_2)_2$ ) treatment, the enzyme urease rapidly hydrolyzes the urea N ( $\text{CO}(\text{NH}_2)_2$ ) to  $\text{NH}_4^+$  ions (Eq. (7)) when urea is applied to the soil (Soares et al.,

带格式的：缩进：首行缩进：0 厘米

带格式的：字体：倾斜

带格式的：缩进：首行缩进：0 字符，定义网格后不调整右缩进，不调整西文与中文之间的空格，不调整中文和数字之间的空格

2012).

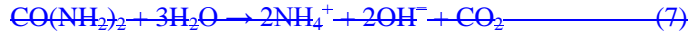

Table 3 shows that the amount of  $\text{NH}_4^+$  hydrolyzed from urea is 1.06 mol, while  $\text{NH}_4^+$  ionized from  $\text{NH}_4\text{NO}_3$ ,  $\text{NH}_4\text{HCO}_3$ ,  $\text{NH}_4\text{Cl}$ ,  $(\text{NH}_4)_2\text{CO}_3$  and  $(\text{NH}_4)_3\text{PO}_4$  is 0.54 mol, 1.08 mol, 1.07 mol, 1.06 mol and 0.03 mol, respectively (Table 3). Although the study from Singh et al showed that a part of  $\text{NH}_4^+$  may be lost as ammonia ( $\text{NH}_3$ ) and subsequently as nitrous oxide ( $\text{N}_2\text{O}$ ) (Singh et al., 2013), yet the rest ammonium ( $\text{NH}_4^+$ ) is mainly oxidized in soil by autotrophic bacteria (like Nitrosomonas) during nitrification, resulting in nitrite  $\text{NO}_2^-$  and  $\text{H}^+$  ions. Nitrite is, in turn, oxidized by another bacterium, such as Nitrobacter, resulting in nitrate ( $\text{NO}_3^-$ ) (Eq. (8)) (Perrin et al., 2008).

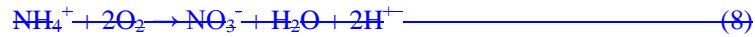

The protons ( $\text{H}^+$ ) produced by nitrification can be neutralized in two ways:

(i) either by exchange process with base cations in the soil exchange complex

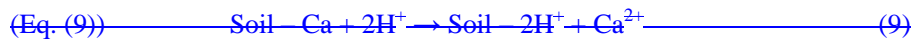

(ii) or via carbonate mineral dissolution (Eq.(10))

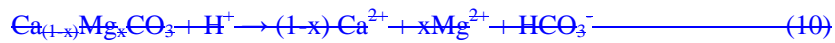

Consequently, after Eq. (8) and Eq. (10) are combined, carbonate weathering by protons produced by nitrification is supposed to becomes (Eq. 11) (See details in Perrin et al., 2008 and Gandois et al., 2011).

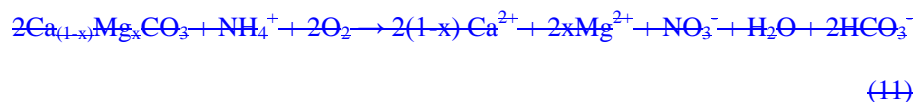

The Rew of limestone tablets and the initial concentration of  $\text{NH}_4^+$  are plotted in

Fig. 4. A distinct relationship between them is observed: the  $A_{ew}$  and  $R_{ew}$  in  $NH_4NO_3$ ,  $NH_4HCO_3$ ,  $NH_4Cl$ ,  $(NH_4)_2CO_3$  and urea treatments are bigger than in control treatment, where the initial concentration of  $NH_4^+$  displays similar results (Fig. 4). This suggests that carbonate weathering in  $NH_4NO_3$ ,  $NH_4HCO_3$ ,  $NH_4Cl$ ,  $(NH_4)_2CO_3$  and urea treatments are mainly attributed to the dissolution reaction described as Eq. (11). This process of carbonate weathering by protons from nitrification has been proven by many studies, from laboratory to field (Semhi and Suchet, 2000; Bertrand et al., 2007; Oh and Raymond, 2006; Errin et al., 2006; Hamilton et al., 2007; Biasi et al., 2008; Perrin et al., 2008; Barnes and Raymond, 2009; Chao et al., 2011; West and McBride, 2005; Gandois et al., 2011). According to the estimation from Yue et al. (2015), The enhanced  $HCO_3^-$  flux due to nitrification of  $NH_4^+$  at Houzhai catchment of Guizhou province would be  $3.72 \times 10^5$  kg C/year and account for 18.7% of this flux in the entire catchment (Yue et al., 2015). This is similar to estimates from other small agricultural carbonate basins (12–26%) in Southwest France (Semhi and Suchet, 2000; Perrin et al., 2008).

As discussed above, provided that the loss as ammonia ( $NH_3$ ) and nitrous oxide ( $N_2O$ ) after hydrolyzation is unconsidered in this study, the final equation of carbonate weathering in  $NH_4NO_3$ ,  $NH_4HCO_3$ ,  $NH_4Cl$ ,  $(NH_4)_2CO_3$  and urea treatments will be followed as, respectively:

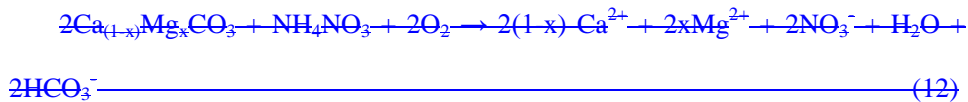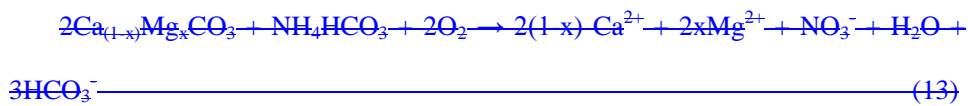

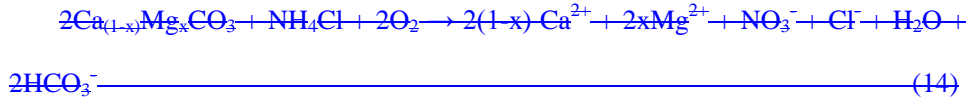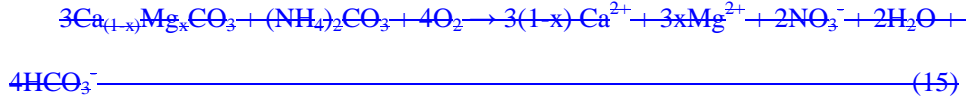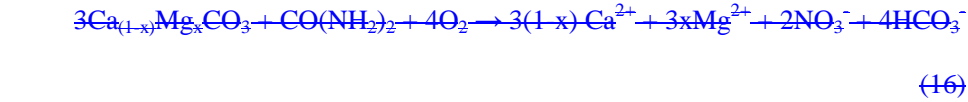

The  $A_{\text{ew}}$  and  $R_{\text{ew}}$  in  $(\text{NH}_4)_3\text{PO}_4$  treatment, unlike in other  $\text{NH}_4$  fertilizer treatments, had not a significant increase comparing with control treatment, which is not only owing to the low amount of added  $\text{NH}_4^+$  in  $(\text{NH}_4)_3\text{PO}_4$  treatment (0.3 mol, see Table 3 ) but also relative to the inhibition of phosphate. After the addition of  $(\text{NH}_4)_3\text{PO}_4$  in soil, calcium orthophosphate (Ca-P) precipitation will form on calcite surface which is initiated with the aggregation of clusters leading to the nucleation and subsequent growth of Ca-P phases, at various pH values and ionic strengths relevant to soil solution conditions (Chien et al., 2011; Wang et al., 2012).

#### 4.4 Little/no effect of $\text{NO}_3$ fertilizer on carbonate weathering and its implication to the evaluation of $\text{CO}_2$ consumption by carbonate weathering

In Fig. 3, the  $A_{\text{ew}}$  and  $R_{\text{ew}}$  without significant difference with control treatment in  $\text{NaNO}_3$  treatment indicates that the addition of  $\text{NO}_3$  fertilizer does not significantly influence carbonate weathering. This result is raising a new problem.

Eq. (5), usually as an expression for the natural weathering process of carbonate, is an important reaction for understanding the kinetics process of carbonate dissolution in carbonate dominated areas, where the molar ratio of  $\text{HCO}_3^-$  and  $\text{Me}^{2+}$  in the river as an indicator is usually used to make estimations of  $\text{CO}_2$  consumption by carbonate weathering at the regional/global scale (Hagedorn and Cartwright, 2009; Li et al., 2009). At agricultural areas, the relationship between  $(\text{Ca}+\text{Mg})/\text{HCO}_3^-$  and  $\text{NO}_3^-$

is usually employed to estimate the contribution of N fertilizer to riverine  $\text{Ca}^{2+}$ ,  $\text{Mg}^{2+}$  and alkalinity (Etchanchu and Probst, 1988; Jiang, 2013; Jiang et al., 2009; Perrin et al., 2008; Semhi and Suchet, 2000). In these studies, the nitrification described as Eq. (8) is usually considered as the unique origin of  $\text{NO}_3^-$ . According to the result of  $\text{NaNO}_3$  treatment in this study, the contribution of protons from nitrification to carbonate weathering may be overestimated if anthropogenic  $\text{NO}_3^-$  is neglected, since the anthropogenic  $\text{NO}_3^-$  does not release the proton described as Eq. (8). For  $\text{NH}_4\text{NO}_3$  fertilizer, the (Eq. (12)) show that the two moles of  $\text{Ca}^{2+} + \text{Mg}^{2+}$ ,  $\text{NO}_3^-$  and  $\text{HCO}_3^-$  will be produced when one mole  $\text{NH}_4\text{NO}_3$  react with 2 moles of carbonate, where only half of  $\text{NO}_3^-$  originate from nitrification described as Eq. (8). This will result in doubled overestimation on the true contribution of the nitrification to  $\text{CO}_2$  consumption by carbonate weathering.

At regional scales, If different fertilizers are added to an agricultural area, the estimation of  $\text{CO}_2$  consumption by carbonate weathering might become more complicated, since the mole ratio of  $\text{Ca} + \text{Mg}$ ,  $\text{HCO}_3^-$  and/or  $\text{NO}_3^-$  between different fertilization treatment is different (see Eq. (8) (12)). Thus, the related anthropogenic inputs (e.g.  $\text{Ca} + \text{Mg}$ ,  $\text{NH}_4$ ,  $\text{NO}_3^-$ ,  $\text{HCO}_3^-$ , etc.) need to be investigated to more accurately estimate the impact of fertilization on carbonate weathering and its  $\text{CO}_2$  consumption. Moreover, the statement that nitrogenous fertilizer can aid carbonate weathering may result in misunderstanding more or less, it should not be nitrogenous fertilizer but, rather, ammonium fertilizer.

## 5. Conclusion

The impact of the addition of different fertilizer ( $\text{NH}_4\text{NO}_3$ ,  $\text{NH}_4\text{HCO}_3$ ,  $\text{NaNO}_3$ ,  $\text{NH}_4\text{Cl}$ ,  $(\text{NH}_4)_2\text{CO}_3$ ,  $\text{Ca}_3(\text{PO}_4)_2$ ,  $(\text{NH}_4)_3\text{PO}_4$ ,  $\text{Ca-Mg-P}$ , Urea and  $\text{K}_2\text{CO}_3$ ) on carbonate weathering was studied in a field column experiment with carbonate rock tablets at its

bottom of each. The weathering amount and ratio of carbonate rock tablets showed that the addition of urea,  $\text{NH}_4\text{NO}_3$ ,  $\text{NH}_4\text{HCO}_3$ ,  $\text{NH}_4\text{Cl}$  and  $(\text{NH}_4)_2\text{CO}_3$  distinctly increased carbonate weathering, which was attributed to the nitrification of  $\text{NH}_4^+$ , and the addition of  $\text{Ca}_3(\text{PO}_4)_2$ , Ca-Mg-P and  $\text{K}_2\text{CO}_3$  induced carbonate precipitation due to common ion effect. While the  $(\text{NH}_4)_3\text{PO}_4$  and  $\text{NaNO}_3$  addition did not impact significantly on carbonate weathering, where the former can be attributed to low added amount of  $(\text{NH}_4)_3\text{PO}_4$ , may be related to the inhibition of phosphate, and the latter seemed to be raising a new question. The little impact of nitrate on carbonate weathering may result in the overestimation of impact of N-fertilizer on  $\text{CO}_2$  consumption by carbonate weathering at the regional/global scale if the effect of  $\text{NO}_3^-$  and  $\text{NH}_4^+$  are not distinguished. Thus, the related anthropogenic inputs (e.g. Ca+Mg,  $\text{NH}_4^+$ ,  $\text{NO}_3^-$ ,  $\text{HCO}_3^-$ , etc.) need to be investigated to more accurately estimate the impact of fertilization on carbonate weathering and its  $\text{CO}_2$  consumption. Moreover, in order to avoid misunderstanding more or less, the statement that nitrogenous fertilizer can aid carbonate weathering should be replaced by ammonium fertilizer.

## 6. Acknowledgements

This study ~~is~~was supported jointly by the Basic Science Research Fund from the Institute of Hydrogeology and Environmental Geology (Grant No. SK201208), the Chinese National Natural Science Foundation (No. 41403107 and No. 41325010), and the China Geological Survey Projects (No. 12120113005900).

## References:

带格式的: 字体: 三号

带格式的: 左

带格式的: 字体: 五号

Amiotte Suchet, P., Probst, J.L. and Ludwig, W., 2003. Worldwide distribution of continental rock lithology: Implications for the atmospheric/soil CO<sub>2</sub> uptake by continental weathering and alkalinity river transport to the oceans. *Global Biogeochemical Cycles*, 17(2): 1-13.

Andrews, J.A. and Schlesinger, W.H., 2001. Soil CO<sub>2</sub> dynamics, acidification, and chemical weathering in a temperate forest with experimental CO<sub>2</sub> enrichment. *Global Biogeochemical Cycles*, 15: 149-162.

Barnes, R.T. and Raymond, P.A., 2009. The contribution of agricultural and urban activities to inorganic carbon fluxes within temperate watersheds. *Chemical Geology*, 266(3-4): 318-327.

Bertrand, I., Delfosse, O. and Mary, B., 2007. Carbon and nitrogen mineralization in acidic, limed and calcareous agricultural soils: Apparent and actual effects. *Soil Biology and Biochemistry*, 39(1): 276-288.

Biasi, C., Lind, S.E., Pekkarinen, N.M. and Martikainen, P.J. et al., 2008. Direct experimental evidence for the contribution of lime to CO<sub>2</sub> release from managed peat soil. *Soil Biology and Biochemistry*, 40(10): 2660-2669.

Calmels, D., Gaillardet, J. and François, L., 2014. Sensitivity of carbonate weathering to soil CO<sub>2</sub> production by biological activity along a temperate climate transect. *Chemical Geology*, 390(0): 74-86.

Chao, S., Changli, L., Junkun, W., Yun, Z. and Hongbing, H., 2011. Impact of the Addition of a Compound Fertilizer on the Dissolution of Carbonate Rock Tablets: a Column Experiment. *Applied Geochemistry*, 26(S): 170-173.

~~Chao, S., Changli, L., Junkun, W., Yun, Z. and Hongbing, H., 2011. Impact of the Addition of a Compound Fertilizer on the Dissolution of Carbonate Rock Tablets: a Column Experiment. *Applied Geochemistry*, 26(S): 170-173.~~

Chao, S., Changli, L., Yun, Z. and Hongbing, H., 2014. Impact of animal manure addition on agricultural lime weathering in acidic soil: pH dependence and CO<sub>2</sub> independence of agricultural lime weathering. *Procedia Earth and Planetary Science*, 10: 405-409.

Chao, S., Chang-li, L., Yun, Z. and Hong-bing, H., 2017. Impact of animal manure addition on the weathering of agricultural lime in acidic soils: The agent of carbonate weathering. *Journal of Groundwater Science and Engineering*, 5(2): 202-212.

Chien, S.H., Prochnow, L.I., Tu, S. and Snyder, C.S., 2011. Agronomic and environmental aspects of phosphate fertilizers varying in source and solubility: an update review. *Nutrient Cycling in Agroecosystems*, 89(2): 229-255.

Chou, L., Garrels, R.M. and Wollast, R., 1989. Comparative study of the kinetics and mechanisms of dissolution of carbonate minerals. *Chemical Geology*, 78(3-4): 269-282.

Dreybrodt, W., 1988. Processes in karst systems: physics, chemistry, and geology. Springer-Verlag Berlin Heidelberg, 0-288 pp.

Dreybrodt, W., Lauckner, J., Zaihua, L., Svensson, U. and Buhmann, D., 1996. The kinetics of the reaction  $\text{CO}_2 + \text{H}_2\text{O} \rightarrow \text{H}^+ + \text{HCO}_3^-$  as one of the rate limiting steps for the dissolution of calcite in the system  $\text{H}_2\text{O}-\text{CO}_2-\text{CaCO}_3$ . *Geochimica et Cosmochimica Acta*, 60(18): 3375-3381.

Egli, M. and Fitze, P., 2001. Quantitative aspects of carbonate leaching of soils with differing ages and climates. *Catena*, 46(1): 35-62.

Errin, A.S.P., Robst, A.P. and Robst, J.L.P., 2006. Impact of nitrogen fertilizers on natural weathering processes : Evident role on CO<sub>2</sub> consumption The oxygen isotopic composition of Precambrian cherts, *Goldschmidt Conference*, pp. 2332-2332.

Etchanchu, D. and Probst, J., 1988. Evolution of the chemical composition of the Garonne River water

during the period 1971-1984. *Hydrological Sciences Journal*, 33(3): 243-256.

Gams, I., 1981. Comparative research of limestone solution by means of standard tablets. *Proceedings of the 8th International Congress of Speleology*, Bowling Green, Kentucky, ~~pp~~USA, 1: 273-275.

Gams, I., 1985. International comparative measurements of surface solution by means of standard limestone tablets. *Razprave IV, Razreda Sazu*, 26: 361-386.

Gandois, L., Perrin, A.S. and Probst, A., 2011. Impact of nitrogenous fertiliser-induced proton release on cultivated soils with contrasting carbonate contents: A column experiment. *Geochimica et Cosmochimica Acta*, 75: 1185-1198.

GBS, 2014. 2014 Guizhou Statistical Yearbook. Statistical Press of China, Beijing.

Hagedorn, B. and Cartwright, I., 2009. Climatic and lithologic controls on the temporal and spatial variability of CO<sub>2</sub> consumption via chemical weathering: An example from the Australian Victorian Alps. *Chemical Geology*, 260(3-4): 234-253.

Hamilton, S.K., Kurzman, A.L., Arango, C., Jin, L. and Robertson, G.P., 2007. Evidence for carbon sequestration by agricultural liming. *Global Biogeochemical Cycles*, 21(GB2021): 1-12.

Han, Z. and Jin, Z., 1996. Hydrogeology of Guizhou Province, China. Seismic Publication, Beijing.

Hunter, A.H., 1980. Laboratory and greenhouse techniques for nutrient survey to determine the soil amendments required for optimum plant growth. Mimeograph. Agro Service International (ASI), Florida, USA.

Jiang, Y., 2013. The contribution of human activities to dissolved inorganic carbon fluxes in a karst underground river system: Evidence from major elements and  $\delta^{13}\text{C}_{\text{DIC}}$  in Nandong, Southwest China. *Journal of Contaminant Hydrology*, 152(9): 1-11.

Jiang, Y., Wu, Y., Groves, C., Yuan, D. and Kambesis, P., 2009. Natural and anthropogenic factors affecting the groundwater quality in the Nandong karst underground river system in Yunan, China. *Journal of Contaminant Hydrology*, 109(1-4): 49-61.

Jiang, Z. and Yuan, D., 1999. CO<sub>2</sub> source-sink in karst processes in karst areas of China. *Episodes*, 22(1): 33-35.

Jiang, Z., Lian, Y. and Qin, X., 2013. Carbon cycle in the epikarst systems and its ecological effects in South China. *Environmental Earth Sciences*, 68(1): 151-158.

Kiefer, R.H., 1994. Temporal cycles of karst denudation in northwest Georgia, USA. *Earth Surface Processes and Landforms*, 19(3): 213-232.

Kitano, Y., Okumura, M. and Idogaki, M., 1978. Uptake of phosphate ions by calcium carbonate. *Geochemical Journal*, 12: 29-37.

Kump, L.R., Brantley, S.L. and Arthur, M.A., 2000. Chemical weathering, atmospheric CO<sub>2</sub>, and climate. *Annual Review of Earth and Planetary Sciences*, 28(1): 611-667.

Lang, Y., Liu, C., Zhao, Z., Li, S. and Han, G., 2006. Geochemistry of surface and ground water in Guiyang, China: Water/rock interaction and pollution in a karst hydrological system. *Applied Geochemistry*, 21(6): 887-903.

Lerman, A. and Wu, L., 2006. CO<sub>2</sub> and sulfuric acid controls of weathering and river water composition. *Journal of Geochemical Exploration*, 88(1-3): 427-430.

Lerman, A., Wu, L. and Mackenzie, F.T., 2007. CO<sub>2</sub> and H<sub>2</sub>SO<sub>4</sub> consumption in weathering and material transport to the ocean, and their role in the global carbon balance. *Marine Chemistry*, 106(1-2): 326-350.

Li, S., Calmels, D., Han, G., Gaillardet, J. and Liu, C., 2008. Sulfuric acid as an agent of carbonate weathering constrained by  $\delta^{13}\text{C}_{\text{DIC}}$ : Examples from Southwest China. *Earth and Planetary Science*

Letters, 270(3-4): 189-199.

Li, S., Xu, Z., Wang, H., Wang, J. and Zhang, Q., 2009. Geochemistry of the upper Han River basin, China: 3: Anthropogenic inputs and chemical weathering to the dissolved load. *Chemical Geology*, 264(1-4): 89-95.

Lian, B., Chen, Y., Zhu, L. and Yang, R., 2008. Effect of Microbial Weathering on Carbonate Rocks. *Earth Science Frontiers*, 15(6): 90-99.

Liu, C., Li, S., Lang, Y. and Xiao, H., 2006. Using  $\delta^{15}\text{N}$ - and  $\delta^{18}\text{O}$ -values To identify Nitrate Sources in Karst Ground Water, Guiyang, Southwest China. *Environmental Science & Technology*, 40(22): 6928-6933.

Liu, Z., Sun, H., Lu, B., Liu, X., Ye, W. and Zeng, C. et al., 2010. Wet-dry seasonal variations of hydrochemistry and carbonate precipitation rates in a travertine-depositing canal at Baishuitai, Yunnan, SW China: Implications for the formation of biannual laminae in travertine and for climatic reconstruction. *Chemical Geology*, 273(3-4): 258-266.

Liu, Z., 2011. "-Method of maximum potential dissolution" to calculate the intensity of karst process and the relevant carbon sink: With discussions on methods of solute load and carbonate-rock-tablet test. *Carsologica Sinica*, 30(4): 379-382.

Liu, Z. and Dreybrodt, W., 1997. Dissolution kinetics of calcium carbonate minerals in  $\text{H}_2\text{O}$ - $\text{CO}_2$  solutions in turbulent flow: The role of the diffusion boundary layer and the slow reaction  $\text{H}_2\text{O} + \text{CO}_2 \leftrightarrow \text{H}^+ + \text{HCO}_3^-$ . *Geochimica et Cosmochimica Acta*, 61(14): 2879-2889.

Liu, Z., Dreybrodt, W. and Liu, H., 2011. Atmospheric  $\text{CO}_2$  sink: silicate weathering or carbonate weathering? *Applied Geochemistry*, 26(S): 292-294.

NBS, 2014. 2014 Statistical Yearbook. Statistical Press of China, Beijing.

Oh, N. and Raymond, P.A., 2006. Contribution of agricultural liming to riverine bicarbonate export and  $\text{CO}_2$  sequestration in the Ohio River basin. *Global Biogeochemical Cycles*, 20(3): 1-17.

Perrin, A., Probst, A. and Probst, J., 2008. Impact of nitrogenous fertilizers on carbonate dissolution in small agricultural catchments: Implications for weathering  $\text{CO}_2$  uptake at regional and global scales. *Geochimica et Cosmochimica Acta*, 72(13): 3105-3123.

Pierson-wickmann, A., Aquilina, L., Martin, C., Ruiz, L. and Molénat, J., 2009. High chemical weathering rates in first-order granitic catchments induced by agricultural stress. *Chemical Geology*, 265: 369-380.

Plan, L., 2005. Factors controlling carbonate dissolution rates quantified in a field test in the Austrian Alps. *Geomorphology*, 68(3-4): 201-212.

Plummer, L.N., Wigley, T. and Parkhurst, D.L., 1978. The kinetics of calcite dissolution in  $\text{CO}_2$ -water systems at 5 to 60 °C and 0.0 to 1 atm  $\text{CO}_2$ . *American Journal of Science*, 278: 179-216.

Pokrovsky, O.S., Golubev, S.V., Schott, J. and Castillo, A., 2009. Calcite, dolomite and magnesite dissolution kinetics in aqueous solutions at acid to circumneutral pH, 25 to 150 °C and 1 to 55 atm  $\text{pCO}_2$ : New constraints on  $\text{CO}_2$  sequestration in sedimentary basins. *Chemical Geology*, 265(1-2): 20-32.

Probst, J., 1986. Dissolved and suspended matter transported by the Girou River (France): mechanical and chemical erosion rates in a calcareous molasse basin. *Hydrological Sciences Journal*, 31(1): 61-79.

Semhi, K. and Suchet, A., 2000. Impact of nitrogen fertilizers on the natural weathering-erosion processes and fluvial transport in the Garonne basin. *Applied Geochemistry*, 15(6): 865-878.

Shin, W., Ryu, J., Mayer, B., Lee, K. and Lee, S., 2014. Natural and anthropogenic sources and processes affecting water chemistry in two South Korean streams. *Science of the Total Environment*,

485: 270-280.

Singh, J., Kunhikrishnan, A., Bolan, N.S. and Sagggar, S., 2013. Impact of urease inhibitor on ammonia and nitrous oxide emissions from temperate pasture soil cores receiving urea fertilizer and cattle urine. *Science of the Total Environment*, 465(4): 56-63.

Soares, J.R., Cantarella, H. and Menegale, M.L.D.C., 2012. Ammonia volatilization losses from surface-applied urea with urease and nitrification inhibitors. *Soil Biology and Biochemistry*, 52(4): 82-89.

Trudgill, S.T., 1975. Measurement of erosional weight loss of rock tablets. *British Geomorphological Research Group Technical Bulletin*, 17: 13-2019.

Wang, L., Ruiz-Agudo, E., Putnis, C.V., Menneken, M. and Putnis, A., 2012. Kinetics of Calcium Phosphate Nucleation and Growth on Calcite: Implications for Predicting the Fate of Dissolved Phosphate Species in Alkaline Soils. *Environmental Science & Technology*, 46(2): 834-842.

West, T.O. and McBride, A.C., 2005. The contribution of agricultural lime to carbon dioxide emissions in the United States: dissolution, transport, and net emissions. *Agriculture, Ecosystems and Environment*, 108(2): 145-154.

Yue, F.J., Li, S.L., Liu, C.Q., Lang, Y.C. and Ding, H., 2015. Sources and transport of nitrate constrained by the isotopic technique in a karst catchment: an example from Southwest China. *Hydrological Processes*, 29(8): 1883-1893.

Zeng, C., Zhao, M., Yang, R. and Liu, Z., 2014. Comparison of karst processes-related carbon sink intensity calculated by carbonate rock tablet test and solute load method: a case study in the Chenqi karst spring system. *Hydrogeology & Engineering Geology*, 41(1): 106-111.

Zhang, C., 2011. Carbonate rock dissolution rates in different landuses and their carbon sink effect. *Chinese Science Bulletin*, 56(35): 3759-3765.

## References:

Amiotte Suchet, P., J.L. Probst, and W. Ludwig. 2003. Worldwide distribution of continental rock lithology: Implications for the atmospheric/soil CO<sub>2</sub> uptake by continental weathering and alkalinity river transport to the oceans. *Global Biogeochem Cy* 17:1-13.

Andrews, J.A., and W.H. Schlesinger. 2001. Soil CO<sub>2</sub> dynamics, acidification, and chemical weathering in a temperate forest with experimental CO<sub>2</sub> enrichment. *Global Biogeochem. Cycles* 15:149-162.

Barnes, R.T., and P.A. Raymond. 2009. The contribution of agricultural and urban activities to inorganic carbon fluxes within temperate watersheds. *Chem Geol* 266:318-327.

Bertrand, I., O. Delfosse, and B. Mary. 2007. Carbon and nitrogen mineralization in acidic, limed and calcareous agricultural soils: Apparent and actual effects. *Soil Biology and Biochemistry* 39:276-288.

Biasi, C., S.E. Lind, N.M. Pekkarinen, J.T. Huttunen, N.J. Shurpali, N.P. Hyvönen, M.E. Repo, and P.J. Martikainen. 2008. Direct experimental evidence for the contribution of lime to CO<sub>2</sub> release from managed peat soil. *Soil Biology and Biochemistry* 40:2660-2669.

Calmels, D., J. Gaillardet, and L. François. 2014. Sensitivity of carbonate weathering to soil CO<sub>2</sub> production by biological activity along a temperate climate transect. *Chem Geol* 390:74-86.

Chao, S., L. Changli, Z. Yun, and H. Hongbing. 2014. Impact of animal manure addition on agricultural lime weathering in acidic soil: pH dependence and CO<sub>2</sub> independence of agricultural lime weathering. *Procedia Earth and Planetary Science*:405-409.

Chao, S., L. Changli, W. Junkun, Z. Yun, and H. Hongbing. 2011. Impact of the Addition of a

带格式的：字体：小四

带格式的：两端对齐

[Compound Fertilizer on the Dissolution of Carbonate Rock Tablets: a Column Experiment. Appl Geochem 26:170-173.](#)

[Chien, S.H., L.I. Prochnow, S. Tu, and C.S. Snyder. 2011. Agronomic and environmental aspects of phosphate fertilizers varying in source and solubility: an update review. Nutr Cycl Agroecosys 89:229-255.](#)

[Chou, L., R.M. Garrels, and R. Wollast. 1989. Comparative study of the kinetics and mechanisms of dissolution of carbonate minerals. Chem Geol 78:269-282.](#)

[Dreybrodt, W. 1988. Processes in karst systems: physics, chemistry, and geology Springer-Verlag Berlin Heidelberg.](#)

[Dreybrodt, W., J. Lauckner, L. Zaihua, U. Svensson, and D. Buhmann. 1996. The kinetics of the reaction  \$\text{CO}\_2 + \text{H}\_2\text{O} \rightarrow \text{H}^+ + \text{HCO}\_3^-\$  as one of the rate limiting steps for the dissolution of calcite in the system  \$\text{H}\_2\text{O}-\text{CO}\_2-\text{CaCO}\_3\$ . Geochim Cosmochim Acta 60:3375-3381.](#)

[Egli, M., and P. Fitze. 2001. Quantitative aspects of carbonate leaching of soils with differing ages and climates. Catena 46:35-62.](#)

[Errin, A.S.P., A.P. Robst, and J.L.P. Robst. 2006. Impact of nitrogen fertilizers on natural weathering processes : Evident role on  \$\text{CO}\_2\$  consumption The oxygen isotopic composition of Precambrian cherts, pp. 2332-2332 Goldschmidt Conference, Vol. 58.](#)

[Etchanchu, D., and J. Probst. 1988. Evolution of the chemical composition of the Garonne River water during the period 1971-1984. Hydrological sciences journal 33:243-256.](#)

[\(ed.\) 1981. Proceedings of the 8th International Congress of Speleology Bowling Green, Kentucky.](#)

[Gams, I. 1985. International comparative measurements of surface solution by means of standard limestone tablets. Razpr IV Razeda Sazu 26:361-386.](#)

[Gandois, L., A.S. Perrin, and A. Probst. 2011. Impact of nitrogenous fertiliser-induced proton release on cultivated soils with contrasting carbonate contents: A column experiment. Geochim Cosmochim Acta 75:1185-1198.](#)

[GBS. 2014. 2014 Guizhou Statistical Yearbook Statistical Press of China, Beijing.](#)

[Hagedorn, B., and I. Cartwright. 2009. Climatic and lithologic controls on the temporal and spatial variability of  \$\text{CO}\_2\$  consumption via chemical weathering: An example from the Australian Victorian Alps. Chem Geol 260:234-253.](#)

[Hamilton, S.K., A.L. Kurzman, C. Arango, L. Jin, and G.P. Robertson. 2007. Evidence for carbon sequestration by agricultural liming. Global Biogeochem Cy 21:1-12.](#)

[Han, Z., and Z. Jin. 1996. Hydrogeology of Guizhou Province, China Seismic Publication, Beijing.](#)

[Hunter, A.H. 1980. Laboratory and greenhouse techniques for nutrient survey to determine the soil amendments required for optimum plant growth. Mimeograph. Agro-Service-International \(ASI\), Florida, USA.](#)

[Jiang, Y. 2013. The contribution of human activities to dissolved inorganic carbon fluxes in a karst underground river system: Evidence from major elements and  \$\delta^{13}\text{C}\_{\text{DIC}}\$  in Nandong, Southwest China. J Contam Hydrol 152:1-11.](#)

[Jiang, Y., Y. Wu, C. Groves, D. Yuan, and P. Kambesis. 2009. Natural and anthropogenic factors affecting the groundwater quality in the Nandong karst underground river system in Yunan, China. J Contam Hydrol 109:49-61.](#)

[Jiang, Z., and D. Yuan. 1999.  \$\text{CO}\_2\$ -source sink in karst processes in karst areas of China. Episodes 22:33-35.](#)

[Jiang, Z., Y. Lian, and X. Qin. 2013. Carbon cycle in the epikarst systems and its ecological effects in](#)

South China. *Environ Earth Sci* 68:151-158.

Kiefer, R.H. 1994. Temporal cycles of karst denudation in northwest Georgia, USA. *Earth Surf Proc Land* 19:213-232.

Kitano, Y., M. Okumura, and M. Idogaki. 1978. Uptake of phosphate ions by calcium carbonate. *Geochem J*:29-37.

Kump, L.R., S.L. Brantley, and M.A. Arthur. 2000. Chemical weathering, atmospheric CO<sub>2</sub>, and climate. *Annu Rev Earth Pl Sc* 28:611-667.

Lang, Y., C. Liu, Z. Zhao, S. Li, and G. Han. 2006. Geochemistry of surface and ground water in Guiyang, China: Water/rock interaction and pollution in a karst hydrological system. *Appl Geochem* 21:887-903.

Lerman, A., and L. Wu. 2006. CO<sub>2</sub> and sulfuric acid controls of weathering and river water composition. *J Geochem Explor* 88:427-430.

Lerman, A., L. Wu, and F.T. Mackenzie. 2007. CO<sub>2</sub> and H<sub>2</sub>SO<sub>4</sub> consumption in weathering and material transport to the ocean, and their role in the global carbon balance. *Mar Chem* 106:326-350.

Li, S., D. Calmels, G. Han, J. Gaillardet, and C. Liu. 2008. Sulfuric acid as an agent of carbonate weathering constrained by  $\delta^{13}\text{C}_{\text{DIC}}$ : Examples from Southwest China. *Earth Planet Sc Lett* 270:189-199.

Li, S., Z. Xu, H. Wang, J. Wang, and Q. Zhang. 2009. Geochemistry of the upper Han River basin, China: 3. Anthropogenic inputs and chemical weathering to the dissolved load. *Chem Geol* 264:89-95.

Lian, B., Y. Chen, L. Zhu, and R. Yang. 2008. Effect of Microbial Weathering on Carbonate Rocks. *Earth Science Frontiers* 15:90-99.

Liu, C., S. Li, Y. Lang, and H. Xiao. 2006. Using  $\delta^{15}\text{N}$  and  $\delta^{18}\text{O}$  Values To Identify Nitrate Sources in Karst Ground Water, Guiyang, Southwest China. *Environ Sci Technol* 40:6928-6933.

Liu, Z. 2011. "Method of maximum potential dissolution" to calculate the intensity of karst process and the relevant carbon sink: With discussions on methods of solute load and carbonate rock tablet test. *Carsologica Sinica* 30:79-82.

Liu, Z., and W. Dreybrodt. 1997. Dissolution kinetics of calcium carbonate minerals in H<sub>2</sub>O-CO<sub>2</sub> solutions in turbulent flow: The role of the diffusion boundary layer and the slow reaction H<sub>2</sub>O + CO<sub>2</sub>  $\leftrightarrow$  H<sup>+</sup> + HCO<sub>3</sub><sup>-</sup>. *Geochim Cosmochim Acta* 61:2879-2889.

Liu, Z., W. Dreybrodt, and H. Liu. 2011. Atmospheric CO<sub>2</sub> sink: silicate weathering or carbonate weathering? *Appl Geochem* 26:292-294.

Liu, Z., H. Sun, L. Baoying, L. Xiangling, Y. Wenbing, and Z. Cheng. 2010. Wet-dry seasonal variations of hydrochemistry and carbonate precipitation rates in a travertine depositing canal at Baishuitai, Yunnan, SW China: Implications for the formation of biannual laminae in travertine and for climatic reconstruction. *Chem Geol* 273:258-266.

NBS. 2014. 2014 Statistical Yearbook. Statistical Press of China, Beijing.

Oh, N., and P.A. Raymond. 2006. Contribution of agricultural liming to riverine bicarbonate export and CO<sub>2</sub> sequestration in the Ohio River basin. *Global Biogeochem Cy* 20:1-17.

Perrin, A., A. Probst, and J. Probst. 2008. Impact of nitrogenous fertilizers on carbonate dissolution in small agricultural catchments: Implications for weathering CO<sub>2</sub> uptake at regional and global scales. *Geochim Cosmochim Acta* 72:3105-3123.

Pierson-wickmann, A., L. Aquilina, C. Martin, L. Ruiz, and J. Molénat. 2009. High chemical weathering rates in first-order granitic catchments induced by agricultural stress. *Chem Geol* 265:369-380.

Plan, L. 2005. Factors controlling carbonate dissolution rates quantified in a field test in the Austrian alps. *Geomorphology* 68:201-212.

Plummer, L.N., T. Wigley, and D.L. Parkhurst. 1978. The kinetics of calcite dissolution in CO<sub>2</sub>-water systems at 5 to 60 °C and 0.0 to 1 atm CO<sub>2</sub>. *Am J Sci* 278:179-216.

Pokrovsky, O.S., S.V. Golubev, J. Schott, and A. Castillo. 2009. Calcite, dolomite and magnesite dissolution kinetics in aqueous solutions at acid to circumneutral pH, 25 to 150 °C and 1 to 55 atm pCO<sub>2</sub>: New constraints on CO<sub>2</sub> sequestration in sedimentary basins. *Chem Geol* 265:20-32.

Probst, J. 1986. Dissolved and suspended matter transported by the Girou River (France): mechanical and chemical erosion rates in a calcareous molasse basin. *Hydrological Sciences Journal* 31:61-79.

Senhi, K., and A. Suchet. 2000. Impact of nitrogen fertilizers on the natural weathering-erosion processes and fluvial transport in the Garonne basin. *Appl Geochem* 15:865-878.

Shin, W., J. Ryu, B. Mayer, K. Lee, and S. Lee. 2014. Natural and anthropogenic sources and processes affecting water chemistry in two South Korean streams. *Sci Total Environ* 485:270-280.

Singh, J., A. Kunhikrishnan, N.S. Bolan, and S. Saggiar. 2013. Impact of urease inhibitor on ammonia and nitrous oxide emissions from temperate pasture soil cores receiving urea fertilizer and cattle urine. *Sci Total Environ* 465:56-63.

Soares, J.R., H. Cantarella, and M.L.D.C. Menegale. 2012. Ammonia volatilization losses from surface applied urea with urease and nitrification inhibitors. *Soil Biology and Biochemistry* 52:82-89.

Trudgill, S.T. 1975. Measurement of erosional weight loss of rock tablets. *British Geomorphological Research Group Technical Bulletin* 17:13-20.

Wang, L., E. Ruiz-Agudo, C.V. Putnis, M. Menneken, and A. Putnis. 2012. Kinetics of Calcium Phosphate Nucleation and Growth on Calcite: Implications for Predicting the Fate of Dissolved Phosphate Species in Alkaline Soils. *Environ Sci Technol* 46:834-842.

West, T.O., and A.C. McBride. 2005. The contribution of agricultural lime to carbon dioxide emissions in the United States: dissolution, transport, and net emissions. *Agriculture, Ecosystems and Environment* 108:145-154.

Yue, F.J., S.L. Li, C.Q. Liu, Y.C. Lang, and H. Ding. 2015. Sources and transport of nitrate constrained by the isotopic technique in a karst catchment: an example from Southwest China. *Hydrol Process* 29:1883-1893.

Zeng, C., M. Zhao, R. Yang, and Z. Liu. 2014. Comparison of karst processes related carbon sink intensity calculated by carbonate rock tablet test and solute load method: a case study in the Chenqi karst spring system. *Hydrogeology & Engineering Geology* 41:106-111.

Zhang, C. 2011. Carbonate rock dissolution rates in different landuses and their carbon sink effect. *Chinese Sci Bull* 56:3759-3765.

## References:

Amiotte Suchet, P., Probst, J.L. and Ludwig, W., 2003. Worldwide distribution of continental rock lithology: Implications for the atmospheric/soil CO<sub>2</sub> uptake by continental weathering and alkalinity river transport to the oceans. *Global Biogeochemical Cycles*, 17(2): 1-13.

Andrews, J.A. and Schlesinger, W.H., 2001. Soil CO<sub>2</sub> dynamics, acidification, and chemical weathering in a temperate forest with experimental CO<sub>2</sub>-enrichment. *Global Biogeochemical Cycles*, 15(1): 149-162.

Andrews, J.A. and Schlesinger, W.H., 2001. Soil CO<sub>2</sub> dynamics, acidification, and chemical weathering in a temperate forest with experimental CO<sub>2</sub>-enrichment. *Global Biogeochem. Cycles*, 15:

149-162.

Barnes, R.T. and Raymond, P.A., 2009. The contribution of agricultural and urban activities to inorganic carbon fluxes within temperate watersheds. *Chemical Geology*, 266(3-4): 318-327.

Bertrand, I., Delfosse, O. and Mary, B., 2007. Carbon and nitrogen mineralization in acidic, limed and calcareous agricultural soils: Apparent and actual effects. *Soil Biology and Biochemistry*, 39(1): 276-288.

Bhattacharyya, P. et al., 2013. Greenhouse gas emission in relation to labile soil C, N pools and functional microbial diversity as influenced by 39 years long term fertilizer management in tropical rice. *Soil and Tillage Research*, 129: 93-105.

Chao, S., Changli, L., Junkun, W., Yun, Z. and Hongbing, H., 2011. Impact of the Addition of a Compound Fertilizer on the Dissolution of Carbonate Rock Tablets: a Column Experiment. *Applied Geochemistry*, 26(S): 170-173.

Chao, S., Changli, L., Yun, Z. and Hongbing, H., 2014. Impact of animal manure addition on agricultural lime weathering in acidic soil: pH dependence and CO<sub>2</sub> independence of agricultural lime weathering. *Procedia Earth and Planetary Science*(10): 405-409.

Chien, S.H., Prochnow, L.I., Tu, S. and Snyder, C.S., 2011. Agronomic and environmental aspects of phosphate fertilizers varying in source and solubility: an update review. *Nutrient Cycling in Agroecosystems*, 89(2): 229-255.

Chou, L., Garrels, R.M. and Wollast, R., 1989. Comparative study of the kinetics and mechanisms of dissolution of carbonate minerals. *Chemical Geology*, 78(3-4): 269-282.

Dreybrodt, W., Lauckner, J., Zaihua, L., Svensson, U. and Buhmann, D., 1996. The kinetics of the reaction  $\text{CO}_2 + \text{H}_2\text{O} \rightarrow \text{H}^+ + \text{HCO}_3^-$  as one of the rate limiting steps for the dissolution of calcite in the system  $\text{H}_2\text{O}-\text{CO}_2-\text{CaCO}_3$ . *Geochimica et Cosmochimica Acta*, 60(18): 3375-3381.

Egli, M. and Fitze, P., 2001. Quantitative aspects of carbonate leaching of soils with differing ages and climates. *Catena*, 46(1): 35-62.

Errin, A.S.P., Robst, A.P. and Robst, J.L.P., 2006. Impact of nitrogen fertilizers on natural weathering processes : Evident role on CO<sub>2</sub> consumption The oxygen isotopic composition of Precambrian cherts, Goldschmidt Conference, pp. 2332-2332.

Etchanchu, D. and Probst, J., 1988. Evolution of the chemical composition of the Garonne River water during the period 1971-1984. *Hydrological sciences journal*, 33(3): 243-256.

Gams, I., 1985. International comparative measurements of surface solution by means of standard limestone tablets. *Razpr IV Razeda Sazu*, 26: 361-386.

Gandois, L., Perrin, A.S. and Probst, A., 2011. Impact of nitrogenous fertiliser induced proton release on cultivated soils with contrasting carbonate contents: A column experiment. *Geochimica et Cosmochimica Acta*, 75: 1185-1198.

GBS, 2014. 2014 Guizhou Statistical Yearbook. Statistical Press of China, Beijing.

Hagedorn, B. and Cartwright, I., 2009. Climatic and lithologic controls on the temporal and spatial variability of CO<sub>2</sub> consumption via chemical weathering: An example from the Australian Victorian Alps. *Chemical Geology*, 260(3-4): 234-253.

Hamilton, S.K., Kurzman, A.L., Arango, C., Jin, L. and Robertson, G.P., 2007. Evidence for carbon sequestration by agricultural liming. *Global Biogeochemical Cycles*, 21(GB2021): 1-12.

Han, Z. and Jin, Z., 1996. Hydrogeology of Guizhou Province, China. Seismic Publication, Beijing.

Hunter, A.H., 1980. Laboratory and greenhouse techniques for nutrient survey to determine the soil amendments required for optimum plant growth. Mimeograph. Agro Service International (ASI),

Florida, USA.

Jiang, Y., 2013. The contribution of human activities to dissolved inorganic carbon fluxes in a karst underground river system: Evidence from major elements and  $\delta^{13}\text{C}_{\text{DIC}}$  in Nandong, Southwest China. *Journal of Contaminant Hydrology*, 152(0): 1–11.

Jiang, Y., Wu, Y., Groves, C., Yuan, D. and Kambesis, P., 2009. Natural and anthropogenic factors affecting the groundwater quality in the Nandong karst underground river system in Yunnan, China. *Journal of Contaminant Hydrology*, 109(1–4): 49–61.

Jiang, Z. and Yuan, D., 1999.  $\text{CO}_2$  source-sink in karst processes in karst areas of China. *Episodes*, 22(1): 33–35.

Jiang, Z., Lian, Y. and Qin, X., 2013. Carbon cycle in the epikarst systems and its ecological effects in South China. *Environmental earth sciences*, 68(1): 151–158.

Kiefer, R.H., 1994. Temporal cycles of karst denudation in northwest Georgia, USA. *Earth Surface Processes and Landforms*, 19(3): 213–232.

Kitano, Y., Okumura, M. and Idogaki, M., 1978. Uptake of phosphate ions by calcium carbonate. *Geochemical Journal*(12): 29–37.

Lang, Y., Liu, C., Zhao, Z., Li, S. and Han, G., 2006. Geochemistry of surface and ground water in Guiyang, China: Water/rock interaction and pollution in a karst hydrological system. *Applied Geochemistry*, 21(6): 887–903.

Lerman, A. and Wu, L., 2006.  $\text{CO}_2$  and sulfuric acid controls of weathering and river water composition. *Journal of Geochemical Exploration*, 88(1–3): 427–430.

Lerman, A., Wu, L. and Mackenzie, F.T., 2007.  $\text{CO}_2$  and  $\text{H}_2\text{SO}_4$  consumption in weathering and material transport to the ocean, and their role in the global carbon balance. *Marine Chemistry*, 106(1–2): 326–350.

Li, S., Calmels, D., Han, G., Gaillardet, J. and Liu, C., 2008. Sulfuric acid as an agent of carbonate weathering constrained by  $\delta^{13}\text{C}_{\text{DIC}}$ : Examples from Southwest China. *Earth and Planetary Science Letters*, 270(3–4): 189–199.

Li, S., Xu, Z., Wang, H., Wang, J. and Zhang, Q., 2009. Geochemistry of the upper Han River basin, China: 3. Anthropogenic inputs and chemical weathering to the dissolved load. *Chemical Geology*, 264(1–4): 89–95.

Lian, B., Chen, Y., Zhu, L. and Yang, R., 2008. Effect of Microbial Weathering on Carbonate Rocks. *Earth Science Frontiers*, 15(6): 90–99.

Liu, C., Li, S., Lang, Y. and Xiao, H., 2006. Using  $\delta^{15}\text{N}$  and  $\delta^{18}\text{O}$  Values To Identify Nitrate Sources in Karst Ground Water, Guiyang, Southwest China. *Environmental Science & Technology*, 40(22): 6928–6933.

Liu, Z. et al., 2010. Wet-dry seasonal variations of hydrochemistry and carbonate precipitation rates in a travertine-depositing canal at Baishuitai, Yunnan, SW China: Implications for the formation of biannual laminae in travertine and for climatic reconstruction. *Chemical Geology*, 273(3–4): 258–266.

Liu, Z., 2011. "Method of maximum potential dissolution" to calculate the intensity of karst process and the relevant carbon sink: With discussions on methods of solute load and carbonate-rock-tablet test. *Carsologica Sinica*, 30(4): 79–82.

Liu, Z. and Dreybrodt, W., 1997. Dissolution kinetics of calcium carbonate minerals in  $\text{H}_2\text{O}-\text{CO}_2$  solutions in turbulent flow: The role of the diffusion boundary layer and the slow reaction  $\text{H}_2\text{O} + \text{CO}_2 \leftrightarrow \text{H}^+ + \text{HCO}_3^-$ . *Geochimica et Cosmochimica Acta*, 61(14): 2879–2889.

Liu, Z., Dreybrodt, W. and Liu, H., 2011. Atmospheric  $\text{CO}_2$  sink: silicate weathering or carbonate

weathering? *Applied Geochemistry*, 26(S): 292-294.

NBS, 2014. 2014 Statistical Yearbook. Statistical Press of China, Beijing.

Oh, N. and Raymond, P.A., 2006. Contribution of agricultural liming to riverine bicarbonate export and CO<sub>2</sub> sequestration in the Ohio River basin. *Global Biogeochemical Cycles*, 20: 1-17.

Perrin, A., Probst, A. and Probst, J., 2008. Impact of nitrogenous fertilizers on carbonate dissolution in small agricultural catchments: Implications for weathering CO<sub>2</sub> uptake at regional and global scales. *Geochimica et Cosmochimica Acta*, 72(13): 3105-3123.

Pierson-wickmann, A., Aquilina, L., Martin, C., Ruiz, L. and Molénat, J., 2009. High chemical weathering rates in first-order granitic catchments induced by agricultural stress. *Chemical Geology*, 265: 369-380.

Plan, L., 2005. Factors controlling carbonate dissolution rates quantified in a field test in the Austrian alps. *Geomorphology*, 68(3-4): 201-212.

Plummer, L.N., Wigley, T. and Parkhurst, D.L., 1978. The kinetics of calcite dissolution in CO<sub>2</sub>-water systems at 5 to 60 °C and 0.0 to 1 atm CO<sub>2</sub>. *American Journal of Science*, 278: 179-216.

Pokrovsky, O.S., Golubev, S.V., Schott, J. and Castillo, A., 2009. Calcite, dolomite and magnesite dissolution kinetics in aqueous solutions at acid to circumneutral pH, 25 to 150 °C and 1 to 55 atm pCO<sub>2</sub>: New constraints on CO<sub>2</sub> sequestration in sedimentary basins. *Chemical Geology*, 265(1-2): 20-32.

Probst, J., 1986. Dissolved and suspended matter transported by the Girou River (France): mechanical and chemical erosion rates in a calcareous molasse basin. *Hydrological Sciences Journal*, 31(1): 61-79.

Sainju, U.M., Jabro, J.D. and Stevens, W.B., 2008. Soil carbon dioxide emission and carbon content as affected by irrigation, tillage, cropping system, and nitrogen fertilization. *Journal of Environmental Quality*, 37(1): 98-106.

Semhi, K. and Suchet, A., 2000. Impact of nitrogen fertilizers on the natural weathering-erosion processes and fluvial transport in the Garonne basin. *Applied Geochemistry*, 15(6): 865-878.

Singh, J., Kunhikrishnan, A., Bolan, N.S. and Saggiar, S., 2013. Impact of urease inhibitor on ammonia and nitrous oxide emissions from temperate pasture soil cores receiving urea fertilizer and cattle urine. *Science of The Total Environment*, 465(0): 56-63.

Soares, J.R., Cantarella, H. and Menegale, M.L.D.C., 2012. Ammonia volatilization losses from surface applied urea with urease and nitrification inhibitors. *Soil Biology and Biochemistry*, 52(0): 82-89.

Wang, L., Ruiz Agudo, E., Putnis, C.V., Menneken, M. and Putnis, A., 2012. Kinetics of Calcium Phosphate Nucleation and Growth on Calcite: Implications for Predicting the Fate of Dissolved Phosphate Species in Alkaline Soils. *Environmental Science & Technology*, 46(2): 834-842.

West, T.O. and McBride, A.C., 2005. The contribution of agricultural lime to carbon dioxide emissions in the United States: dissolution, transport, and net emissions. *Agriculture, Ecosystems and Environment*, 108(2): 145-154.

West, T.O. and McBride, A.C., 2005. The contribution of agricultural lime to carbon dioxide emissions in the United States: dissolution, transport, and net emissions. *Agriculture, Ecosystems and Environment*, 108(2): 145-154.

Yue, F.J., Li, S.L., Liu, C.Q., Lang, Y.C. and Ding, H., 2015. Sources and transport of nitrate constrained by the isotopic technique in a karst catchment: an example from Southwest China. *Hydrological Processes*, 29(8): 1883-1893.



1153

1154

Table 1 Chemical composition of soil

| Parameter                                                                | Unit     | Values    |
|--------------------------------------------------------------------------|----------|-----------|
| pH                                                                       | -        | 6.94      |
| <u>Content of particles <del>(<math>&lt;0.01\text{mm}</math>)</del></u>  | <u>%</u> | <u>74</u> |
| <u>Content of particles <del>(<math>&lt;0.001\text{mm}</math>)</del></u> | <u>%</u> | <u>45</u> |
| Organic matter                                                           | %        | 0.99      |
| $\text{NH}_4^+\text{-N}$                                                 | mg/kg    | 339.87    |
| $\text{NO}_3^-\text{-N}$                                                 | mg/kg    | 569.05    |
| Available P                                                              | mg/kg    | 8.18      |
| Available K                                                              | mg/kg    | 56.88     |
| Available Ca                                                             | mg/kg    | 3041.06   |
| Available Mg                                                             | mg/kg    | 564.83    |
| Available S                                                              | mg/kg    | 100.72    |
| Available Fe                                                             | mg/kg    | 24.41     |

带格式表格

1155

1156

Table 2 Carbonate weathering under different fertilizer treatments

| Treatment                                       | Limestone                |                                                    | Dolostone                |                                                    |
|-------------------------------------------------|--------------------------|----------------------------------------------------|--------------------------|----------------------------------------------------|
|                                                 | $A_{ew} \cdot R_w / \%g$ | $R_{aw} / g \cdot m^{-2} \cdot a^{-1} R_{ew} / \%$ | $A_{ew} \cdot R_w / \%g$ | $R_{aw} / g \cdot m^{-2} \cdot a^{-1} R_{ew} / \%$ |
| Control                                         | $0.001448 \pm 0.14a$     | $2.00 \pm 0.58a0.48$                               | $-0.001431 \pm 0.09a$    | $-1.57 \pm 0.86a0.34$                              |
| NH <sub>4</sub> NO <sub>3</sub>                 | $0.0174642 \pm 0.28e$    | $24.86 \pm 2.01b6.42$                              | $0.01445.30 \pm 0.87e$   | $20.57 \pm 1.15b5.30$                              |
| NH <sub>4</sub> HCO <sub>3</sub>                | $0.01474.44 \pm 0.81b$   | $21.00 \pm 3.45b4.44$                              | $0.00963.22 \pm 0.87b$   | $13.71 \pm 3.88b3.22$                              |
| NaNO <sub>3</sub>                               | $0.00310.86 \pm 0.17a$   | $4.43 \pm 1.73a0.86$                               | $0.002253 \pm 0.26a$     | $3.14 \pm 1.73a0.53$                               |
| NH <sub>4</sub> Cl                              | $0.01495.54 \pm 0.64be$  | $21.29 \pm 2.45b5.54$                              | $0.01314.77 \pm 0.78be$  | $18.71 \pm 0.86b4.77$                              |
| (NH <sub>4</sub> ) <sub>2</sub> CO <sub>3</sub> | $0.01444.48 \pm 0.95be$  | $20.57 \pm 4.46b4.84$                              | $0.01864.94 \pm 1.91be$  | $26.57 \pm 7.62b4.94$                              |
| Ca <sub>3</sub> (PO <sub>4</sub> ) <sub>2</sub> | $0.00030.01 \pm 0.04a$   | $0.43 \pm 0.86a0.04$                               | $-0.001355 \pm 0.25a$    | $-1.86 \pm 1.29a0.55$                              |
| (NH <sub>4</sub> ) <sub>3</sub> PO <sub>4</sub> | $0.00281.08 \pm 0.34a$   | $4.00 \pm 1.15a1.08$                               | $0.00070.75 \pm 0.21a$   | $1.00 \pm 1.01a0.75$                               |
| Ca-Mg-P                                         | $-0.00130.31 \pm 0.12a$  | $-1.86 \pm 0.43a0.31$                              | $-0.002297 \pm 0.38a$    | $-3.14 \pm 0.72a0.97$                              |
| Urea                                            | $0.02438.48 \pm 0.96d$   | $34.71 \pm 4.32e8.48$                              | $0.01856.59 \pm 0.67d$   | $26.43 \pm 2.73e6.59$                              |
| K <sub>2</sub> CO <sub>3</sub>                  | $-0.000826 \pm 0.15a$    | $-1.14 \pm 0.58a0.26$                              | $-0.001859 \pm 0.15a$    | $-2.57 \pm 0.43a0.59$                              |

1158  $A_{ew}$ — the amount of carbonate weathering;  $R_{ew}$  - the ratio of carbonate weathering;  $R_{aw}$  - the rate of  
1159 carbonate weathering;  $A_{ew} \cdot R_w = 1000 (W_i - W_f) / W_i$ ; and  $R_{ew} = (W_i - W_f) / W_i$ ;  $R_{aw} = (W_i - W_f) / (S \cdot T)$ ,  
1160 where  $W_i$  is the initial weight of the carbonate rock tablets, and  $W_f$  is the final weight.  $S$  is the surface  
1161 area of carbonate weathering rock tablets (In this study, we used a same  $S = 7 \text{ cm}^2$  for every  
1162 tablets), and  $T$  is the experiment period. Values are reported as means  $\pm$  standard deviations,  $n = 3$ .  
1163 Values in each column followed by different letters are significantly ( $p < 0.05$ ) different based on  
1164 one-way ANOVA.

带格式表格

带格式的：字体：Times New Roman

带格式的：上标

带格式的：定义网格后自动调整  
右缩进，孤行控制，调整中文与  
西文文字的间距，调整中文与数字  
的间距

1167  
1168

|  
\_\_\_\_\_

带格式的: 左

1169  
1170

Table 3: The main reaction and effects in fertilized treatments, and the potential nitrogenous transformation (The amount of generated  $\text{NH}_4^+ \text{NO}_3^-$  at the initial phase of the experiment

| Treatment                       | Main reactions and effects                                                                                                                                                                                                                                                                                                                                                                                                                                                                                                                      |
|---------------------------------|-------------------------------------------------------------------------------------------------------------------------------------------------------------------------------------------------------------------------------------------------------------------------------------------------------------------------------------------------------------------------------------------------------------------------------------------------------------------------------------------------------------------------------------------------|
| 1. Control                      | $\text{Ca}_{(1-x)}\text{Mg}_x\text{CO}_3 + \text{CO}_2 + \text{H}_2\text{O} \rightarrow (1-x)\text{Ca}^{2+} + x\text{Mg}^{2+} + 2\text{HCO}_3^-$                                                                                                                                                                                                                                                                                                                                                                                                |
| 2. $\text{NH}_4\text{NO}_3$     | $2\text{Ca}_{(1-x)}\text{Mg}_x\text{CO}_3 + \text{NH}_4\text{NO}_3 + 2\text{O}_2 \rightarrow 2(1-x)\text{Ca}^{2+} + 2x\text{Mg}^{2+} + 2\text{NO}_3^- + \text{H}_2\text{O} + 2\text{HCO}_3^-$                                                                                                                                                                                                                                                                                                                                                   |
| 3. $\text{H}_2\text{HCO}_3$     | $2\text{Ca}_{(1-x)}\text{Mg}_x\text{CO}_3 + \text{NH}_4\text{HCO}_3 + 2\text{O}_2 \rightarrow 2(1-x)\text{Ca}^{2+} + 2x\text{Mg}^{2+} + \text{NO}_3^- + \text{H}_2\text{O} + 3\text{HCO}_3^-$                                                                                                                                                                                                                                                                                                                                                   |
| 4. $\text{NaNO}_3$              | $\text{Ca}_{(1-x)}\text{Mg}_x\text{CO}_3 + \text{NaNO}_3 + \text{CO}_2 + \text{H}_2\text{O} \rightarrow (1-x)\text{Ca}^{2+} + x\text{Mg}^{2+} + \text{Na}^+ + \text{NO}_3^- + 2\text{HCO}_3^-$                                                                                                                                                                                                                                                                                                                                                  |
| 5. $\text{NH}_4\text{Cl}$       | $2\text{Ca}_{(1-x)}\text{Mg}_x\text{CO}_3 + \text{NH}_4\text{Cl} + 2\text{O}_2 \rightarrow 2(1-x)\text{Ca}^{2+} + 2x\text{Mg}^{2+} + \text{NO}_3^- + \text{Cl}^- + \text{H}_2\text{O} + 2\text{HCO}_3^-$                                                                                                                                                                                                                                                                                                                                        |
| 6. $(\text{NH}_4)_2\text{CO}_3$ | $3\text{Ca}_{(1-x)}\text{Mg}_x\text{CO}_3 + (\text{NH}_4)_2\text{CO}_3 + 4\text{O}_2 \rightarrow 3(1-x)\text{Ca}^{2+} + 3x\text{Mg}^{2+} + 2\text{NO}_3^- + 2\text{H}_2\text{O} + 4\text{HCO}_3^-$                                                                                                                                                                                                                                                                                                                                              |
| 7. $\text{Ca}_3(\text{PO}_4)_2$ | (1) Common ion effect: The $\text{Ca}_{(1-x)}\text{Mg}_x\text{CO}_3$ produces when the concentrations of $\text{Ca}^{2+}$ and $\text{Mg}^{2+}$ increases<br>$(1-x)\text{Ca}^{2+} + x\text{Mg}^{2+} + 2\text{HCO}_3^- \rightarrow \text{Ca}_{(1-x)}\text{Mg}_x\text{CO}_3 + \text{CO}_2 + \text{H}_2\text{O}$<br>(2) Inhibition of phosphate to calcite precipitation: calcium phosphate precipitation produces on the surface of calcite after the addition of $\text{PO}_4^{3-}$ in soil, resulting in inhibiting the precipitation of calcite |
| 8. $(\text{NH}_4)_3\text{PO}_4$ | (1) $2\text{Ca}_{(1-x)}\text{Mg}_x\text{CO}_3 + \text{NH}_4^+ + 2\text{O}_2 \rightarrow 2(1-x)\text{Ca}^{2+} + 2x\text{Mg}^{2+} + \text{NO}_3^- + \text{H}_2\text{O} + 2\text{HCO}_3^-$<br>(2) Inhibition of phosphate to calcite dissolution: calcium orthophosphate ( $\text{Ca-P}$ ) precipitation produces on surface of calcite after the addition of $\text{PO}_4^{3-}$ in soil, resulting in inhibiting the dissolution of calcite                                                                                                       |
| 9. $\text{Ca-Mg-P}$             | (1) Common ion effect: The $\text{Ca}_{(1-x)}\text{Mg}_x\text{CO}_3$ produces when the concentrations of $\text{Ca}^{2+}$ and $\text{Mg}^{2+}$ increases<br>$(1-x)\text{Ca}^{2+} + x\text{Mg}^{2+} + 2\text{HCO}_3^- \rightarrow \text{Ca}_{(1-x)}\text{Mg}_x\text{CO}_3 + \text{CO}_2 + \text{H}_2\text{O}$<br>(2) Inhibition of phosphate to calcite precipitation: calcium phosphate precipitation produces on the surface of calcite after the addition of P in soil, resulting in inhibiting the precipitation of calcite                  |
| 10. Urea                        | $3\text{Ca}_{(1-x)}\text{Mg}_x\text{CO}_3 + \text{CO}(\text{NH}_2)_2 + 4\text{O}_2 \rightarrow 3(1-x)\text{Ca}^{2+} + 3x\text{Mg}^{2+} + 2\text{NO}_3^- + 4\text{HCO}_3^-$                                                                                                                                                                                                                                                                                                                                                                      |
| 11. $\text{K}_2\text{CO}_3$     | Common ion effect: The $\text{Ca}_{(1-x)}\text{Mg}_x\text{CO}_3$ produces when the concentration of $\text{HCO}_3^-$ increases<br>(i) $(1-x)\text{Ca}^{2+} + x\text{Mg}^{2+} + 2\text{HCO}_3^- \rightarrow \text{Ca}_{(1-x)}\text{Mg}_x\text{CO}_3 + \text{CO}_2 + \text{H}_2\text{O}$<br>(ii) $\text{K}_2\text{CO}_3 + \text{H}_2\text{O} \rightarrow 2\text{K}^+ + \text{HCO}_3^- + \text{OH}^-$                                                                                                                                              |

带格式的：左侧： 3.17 厘米，右侧： 3.17 厘米，顶端： 2.54 厘米，底端： 2.54 厘米，宽度： 21 厘米，高度： 29.7 厘米

带格式的：下标

带格式的：上标

带格式表格

带格式的：居中

1171

Table 3: The main reaction and effects in these 11 fertilized treatments

| Treatment                       | Main reactions and effects                                                                                                                                                                                                                                                                                       |
|---------------------------------|------------------------------------------------------------------------------------------------------------------------------------------------------------------------------------------------------------------------------------------------------------------------------------------------------------------|
| 1. Control                      | $\text{Ca}_{(1-x)}\text{Mg}_x\text{CO}_3 + \text{CO}_2 + \text{H}_2\text{O} \rightarrow (1-x)\text{Ca}^{2+} + x\text{Mg}^{2+} + 2\text{HCO}_3^-$                                                                                                                                                                 |
| 2. $\text{NH}_4\text{NO}_3$     | $2\text{Ca}_{(1-x)}\text{Mg}_x\text{CO}_3 + \text{NH}_4\text{NO}_3 + 2\text{O}_2 \rightarrow 2(1-x)\text{Ca}^{2+} + 2x\text{Mg}^{2+} + 2\text{NO}_3^- + \text{H}_2\text{O} + 2\text{HCO}_3^-$                                                                                                                    |
| 3. $\text{NH}_4\text{HCO}_3$    | $\text{NH}_4\text{HCO}_3 \rightarrow \text{NH}_3 \uparrow + \text{H}_2\text{O} + \text{CO}_2 \uparrow$<br>$2\text{Ca}_{(1-x)}\text{Mg}_x\text{CO}_3 + \text{NH}_4\text{HCO}_3 + 2\text{O}_2 \rightarrow 2(1-x)\text{Ca}^{2+} + 2x\text{Mg}^{2+} + \text{NO}_3^- + \text{H}_2\text{O} + 3\text{HCO}_3^-$          |
| 4. $\text{NaNO}_3$              | $\text{Ca}_{(1-x)}\text{Mg}_x\text{CO}_3 + \text{NaNO}_3 + \text{CO}_2 + \text{H}_2\text{O} \rightarrow (1-x)\text{Ca}^{2+} + x\text{Mg}^{2+} + \text{Na}^+ + \text{NO}_3^- + 2\text{HCO}_3^-$                                                                                                                   |
| 5. $\text{NH}_4\text{Cl}$       | $2\text{Ca}_{(1-x)}\text{Mg}_x\text{CO}_3 + \text{NH}_4\text{Cl} + 2\text{O}_2 \rightarrow 2(1-x)\text{Ca}^{2+} + 2x\text{Mg}^{2+} + \text{NO}_3^- + \text{Cl}^- + \text{H}_2\text{O} + 2\text{HCO}_3^-$                                                                                                         |
| 6. $(\text{NH}_4)_2\text{CO}_3$ | $(\text{NH}_4)_2\text{CO}_3 \rightarrow 2\text{NH}_3 \uparrow + \text{H}_2\text{O} + \text{CO}_2 \uparrow$<br>$3\text{Ca}_{(1-x)}\text{Mg}_x\text{CO}_3 + (\text{NH}_4)_2\text{CO}_3 + 4\text{O}_2 \rightarrow 3(1-x)\text{Ca}^{2+} + 3x\text{Mg}^{2+} + 2\text{NO}_3^- + 2\text{H}_2\text{O} + 4\text{HCO}_3^-$ |
| 7. $\text{Ca}_3(\text{PO}_4)_2$ | (1) $(1-x)\text{Ca}^{2+} + x\text{Mg}^{2+} + 2\text{HCO}_3^- \rightarrow \text{Ca}_{(1-x)}\text{Mg}_x\text{CO}_3 + \text{CO}_2 + \text{H}_2\text{O}$<br>(2) $\text{Ca} + \text{PO}_4 \rightarrow \text{Ca-P}$                                                                                                    |
| 8. $(\text{NH}_4)_3\text{PO}_4$ | (1) $2\text{Ca}_{(1-x)}\text{Mg}_x\text{CO}_3 + \text{NH}_4^+ + 2\text{O}_2 \rightarrow 2(1-x)\text{Ca}^{2+} + 2x\text{Mg}^{2+} + \text{NO}_3^- + \text{H}_2\text{O} + 2\text{HCO}_3^-$<br>(2) $\text{Ca} + \text{PO}_4 \rightarrow \text{Ca-P}$                                                                 |
| 9. $\text{Ca-Mg-P}$             | (1) $(1-x)\text{Ca}^{2+} + x\text{Mg}^{2+} + 2\text{HCO}_3^- \rightarrow \text{Ca}_{(1-x)}\text{Mg}_x\text{CO}_3 + \text{CO}_2 + \text{H}_2\text{O}$<br>(2) $\text{Ca} + \text{PO}_4 \rightarrow \text{Ca-P}$                                                                                                    |
| 10. Urea                        | $3\text{Ca}_{(1-x)}\text{Mg}_x\text{CO}_3 + \text{CO}(\text{NH}_2)_2 + 4\text{O}_2 \rightarrow 3(1-x)\text{Ca}^{2+} + 3x\text{Mg}^{2+} + 2\text{NO}_3^- + 4\text{HCO}_3^-$                                                                                                                                       |
| 11. $\text{K}_2\text{CO}_3$     | (i) $(1-x)\text{Ca}^{2+} + x\text{Mg}^{2+} + 2\text{HCO}_3^- \rightarrow \text{Ca}_{(1-x)}\text{Mg}_x\text{CO}_3 + \text{CO}_2 + \text{H}_2\text{O}$                                                                                                                                                             |

带格式的：缩进：左侧： 0 厘米，悬挂缩进： 2 字符，首行缩进： -2 字符

1172 (ii)  $K_2CO_3 + H_2O \rightarrow 2K^+ + HCO_3^- + OH^-$   
 1173 Note: (1) Common ion effect: The  $Ca_{(1-x)}Mg_xCO_3$  produceds when the concentrations of  $Ca^{2+}$ ,  $Mg^{2+}$  and/or  
 1174  $HCO_3^-$  increases (for treatment 7, 9 and 11):  $(1-x) Ca^{2+} + xMg^{2+} + 2HCO_3^- \rightarrow Ca_{(1-x)}Mg_xCO_3 + CO_2 + H_2O$ ;  
 1175 (2) Inhibition of ~~phosphate to~~ calcite dissolution/precipitation by phosphate: calcium orthophosphate (Ca-P)  
 1176 precipitation produceds on the surface of calcite after the addition of  $PO_4^{3-}$  in soil, resulting in the inhibition of  
 the dissolution/precipitation of calcite (for treatment 7, 8 and 9):  $Ca + PO_4 \rightarrow Ca-P$

带格式的：缩进：首行缩进： 0.5 字符

带格式的：缩进：首行缩进： 0 字符

带格式的：下标

带格式的：上标

带格式的：左

1177  
1178

Table 4: -The amount of fertilizer-derived  $\text{NH}_4^+$  at the initial phase of the experiment and the potential nitrogenous transformation ( $\text{NH}_4^+ \text{-NO}_3^-$ )

| <u>Treatment</u>                               | <u>Molecular mass</u><br><u>g/mol</u> | <u>Amount of added</u><br><u>fertilizer /g</u> | <u>Molar amount</u><br><u>/mole</u> | <u>Amount of fertilizer-derived</u><br><u><math>\text{NH}_4^+</math> /mole</u> | <u>The maximum of N products</u><br><u>/mole</u> |
|------------------------------------------------|---------------------------------------|------------------------------------------------|-------------------------------------|--------------------------------------------------------------------------------|--------------------------------------------------|
| <u><math>\text{NH}_4\text{NO}_3</math></u>     | <u>80</u>                             | <u>43</u>                                      | <u>0.54</u>                         | <u>0.54</u>                                                                    | <u>1.08</u>                                      |
| <u><math>\text{NH}_4\text{HCO}_3</math></u>    | <u>79</u>                             | <u>85</u>                                      | <u>1.08</u>                         | <u>1.08</u>                                                                    | <u>1.08</u>                                      |
| <u><math>\text{NaNO}_3</math></u>              | <u>85</u>                             | <u>91</u>                                      | <u>1.07</u>                         | <u>0.00</u>                                                                    | <u>1.07</u>                                      |
| <u><math>\text{NH}_4\text{Cl}</math></u>       | <u>53.5</u>                           | <u>57</u>                                      | <u>1.07</u>                         | <u>1.07</u>                                                                    | <u>1.07</u>                                      |
| <u><math>(\text{NH}_4)_2\text{CO}_3</math></u> | <u>96</u>                             | <u>51</u>                                      | <u>0.53</u>                         | <u>1.06</u>                                                                    | <u>1.06</u>                                      |
| <u><math>\text{Ca}_3(\text{PO}_4)_2</math></u> | <u>310</u>                            | <u>52</u>                                      | <u>0.17</u>                         | <u>0.00</u>                                                                    | <u>0.00</u>                                      |
| <u><math>(\text{NH}_4)_3\text{PO}_4</math></u> | <u>149</u>                            | <u>15</u>                                      | <u>0.10</u>                         | <u>0.30</u>                                                                    | <u>0.30</u>                                      |
| <u>Ca-Mg-P</u>                                 | <u>wnd</u>                            | <u>44</u>                                      | <u>wnd</u>                          | <u>0.00</u>                                                                    | <u>0.00</u>                                      |
| <u>Urea</u>                                    | <u>60</u>                             | <u>32</u>                                      | <u>0.53</u>                         | <u>1.06</u>                                                                    | <u>1.06</u>                                      |
| <u><math>\text{K}_2\text{CO}_3</math></u>      | <u>138</u>                            | <u>10</u>                                      | <u>0.07</u>                         | <u>0.00</u>                                                                    | <u>0.00</u>                                      |

1179  
1180  
1181  
1182  
1183

wnd=without no data; The amount of added fertilizer (g) divided by its molecular mass (g/mol) is the molar amount of fertilizer (mole); Gadf\_gram amount of added fertilizers (g); Maaf of added fertilizers (mol).The amounts of fertilizer-derived  $\text{NH}_4^+$  is calculated by their own ionization or hydrolysis processes. The maximum of N products is estimated by their main reactions in tTable 3.

带格式的: 字体: 10 磅, 字体颜色: 黑色

带格式的: 缩进: 左侧: 0 厘米, 首行缩进: 0 字符

带格式的: 字体: 10 磅, 字体颜色: 黑色

带格式的: 字体: 五号

带格式的: 字体: 五号

带格式的: 字体: 五号

带格式的: 字体: 五号

带格式的: 字体: (中文) +中文正文 (宋体), 五号, 字体颜色: 自动设置

带格式的: 字体: (中文) +中文正文 (宋体), 五号, 字体颜色: 自动设置

带格式的: 字体: 五号

带格式的: 字体: (中文) 宋体

带格式的: 字体: 五号

带格式的: 字体: 五号

1184

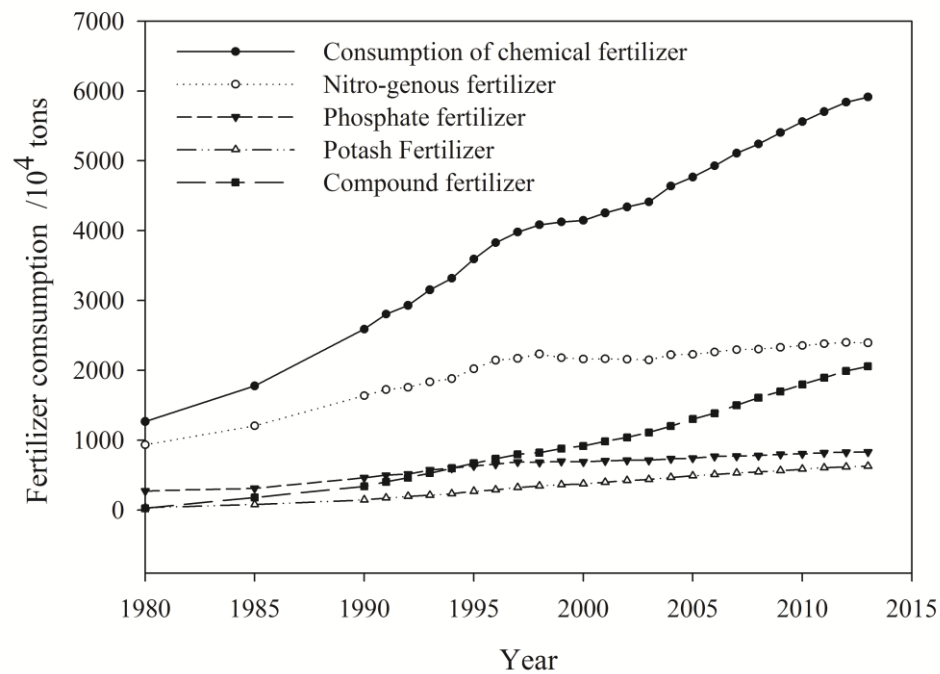

1185

1186

1187

1188

1189

1190

1191

Fig. 1 The change of chemical fertilizer consumption in China during the 1980-2013 period  
The data were collected from National Bureau of Statistics of the People's Republic of China  
(NBS, 2014)(NBS, 2014)(NBS, 2014) (<http://www.stats.gov.cn/tjsj/ndsj/>)

域代码已更改

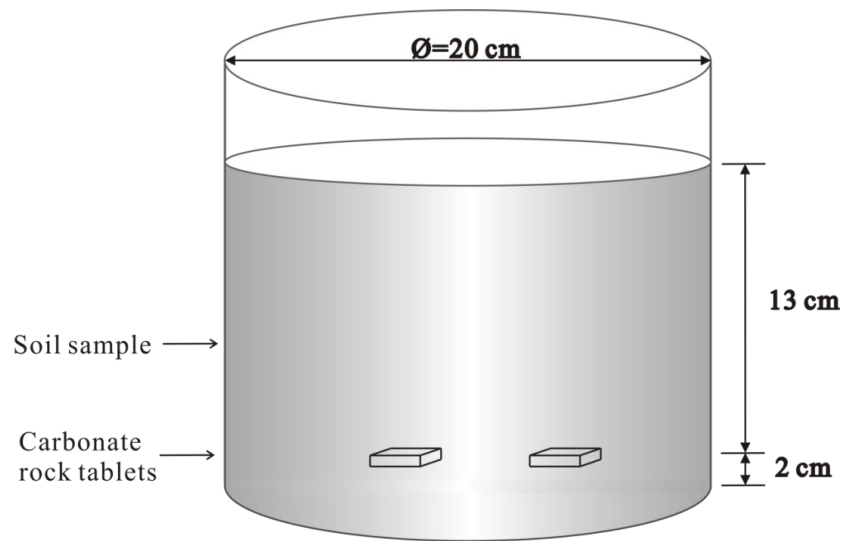

Fig. 2 Sketch ~~map~~ of the soil column with rock tablets

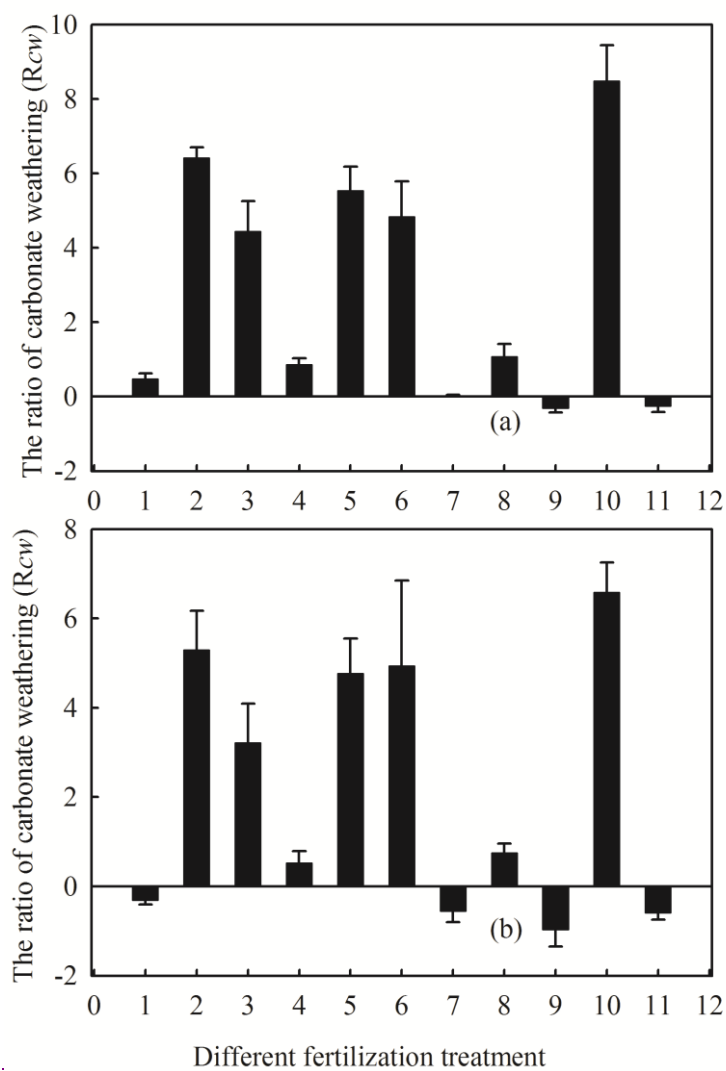

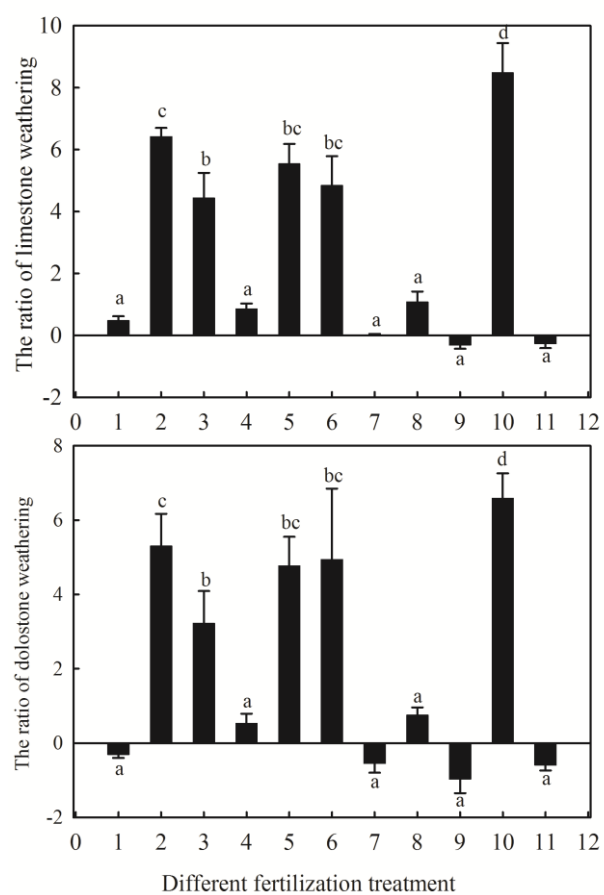

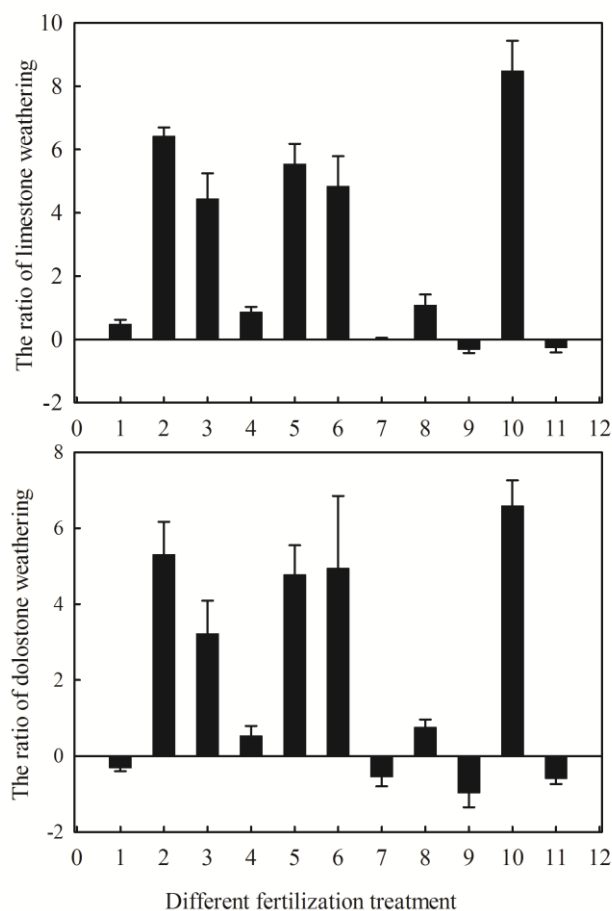

Fig. 3 The ratio of carbonate weathering  $R_w$  (%) of limestone and dolostone under different fertilization treatments

(a) limestone; (b) dolostone. Treatment 1- Control; 2-  $\text{NH}_4\text{NO}_3$ ; 3-  $\text{NH}_4\text{HCO}_3$ ; 4-  $\text{NaNO}_3$ ; 5-  $\text{NH}_4\text{Cl}$ ; 6-  $(\text{NH}_4)_2\text{CO}_3$ ; 7-  $\text{Ca}_3(\text{PO}_4)_2$ ; 8-  $(\text{NH}_4)_3\text{PO}_4$ ; 9- Ca-Mg-P; 10- Urea; 11-  $\text{K}_2\text{CO}_3$ .  $R_{ew} = 1000(W_i - W_f)/W_i$ , where  $W_i$  is the initial weight of the carbonate rock tablets, and  $W_f$  is the final weight. Values in each column followed by different letters are significantly ( $p < 0.05$ ) different based on one-way ANOVA.

带格式的：字体：倾斜

带格式的：缩进：首行缩进：2 字符

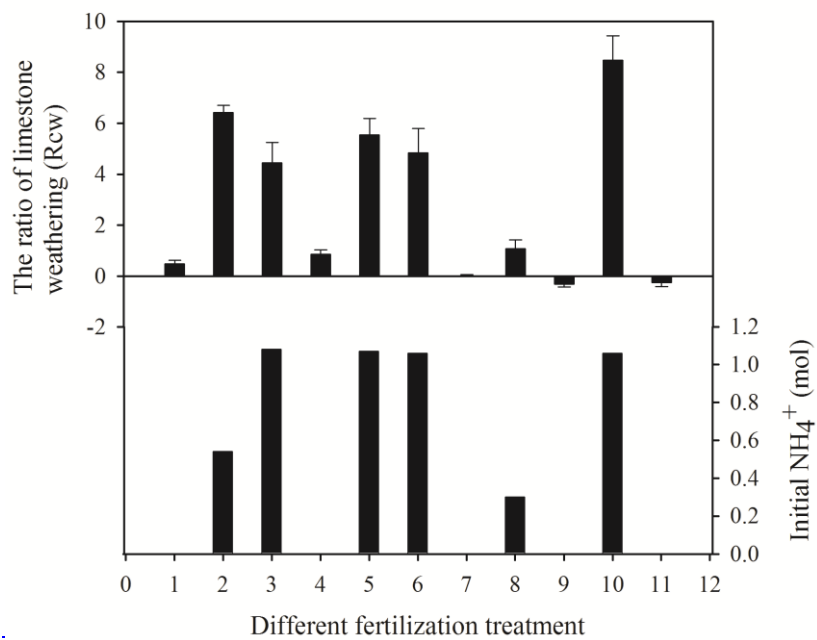

带格式的：缩进：首行缩进： 0 厘米，定义网格后自动调整右缩进，孤行控制，到齐到网格



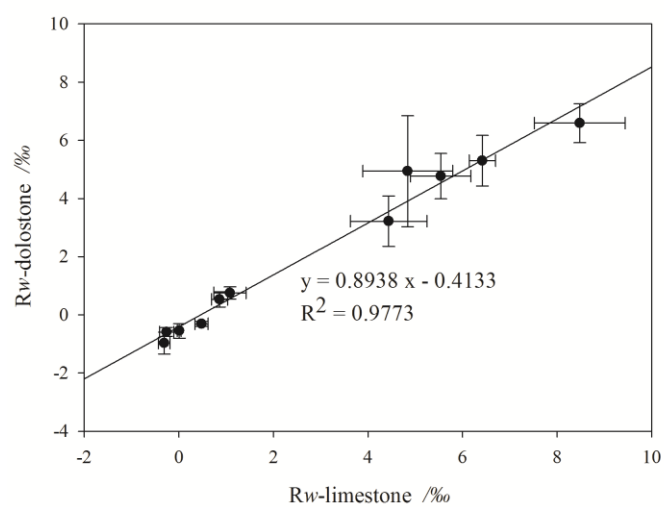

Fig. 4 The linear correlation of  $R_w$  (%) of limestone and dolostone  
 $R_w = 1000(W_i - W_f)/W_i$ , where  $W_i$  is the initial weight of the limestone tablets, and  $W_f$  is their final weight.

1216

1217

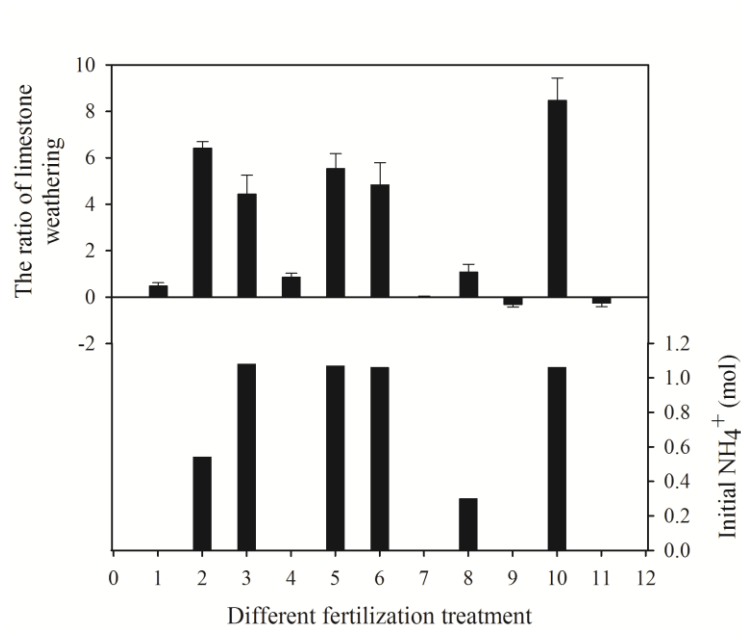

带格式的：居中

1218

1219

1220

1221

1222

1223

1224

1225

1226

1227

1228

Fig. 4-5 The  $R_w$  (%) of limestone ratio of limestone weathering and the molar amount of produced  $\text{NH}_4^+$  under different fertilization-fertilizer treatments

Treatment 1- Control; 2-  $\text{NH}_4\text{NO}_3$ ; 3-  $\text{NH}_4\text{HCO}_3$ ; 4-  $\text{NaNO}_3$ ; 5-  $\text{NH}_4\text{Cl}$ ; 6-  $(\text{NH}_4)_2\text{CO}_3$ ; 7-  $\text{Ca}_3(\text{PO}_4)_2$ ; 8-  $(\text{NH}_4)_3\text{PO}_4$ ; 9- Ca-Mg-P; 10- Urea; 11-  $\text{K}_2\text{CO}_3$ .  $R_w = 1000(W_i - W_f)/W_i$ , where  $W_i$  is the initial weight of the limestone tablets, and  $W_f$  is the final weight.

带格式的：字体：倾斜

校对报告

当前使用的样式是 [Chemical Geology]

当前文档包含的题录共99条

- 1229 | [有0条题录存在必填字段内容缺失的问题](#)
- 1230 | [所有题录的数据正常](#)
